1  
2  
3  
4  
5  
6  
7  
8  
9  
10  
11  
12  
13  
14  
15  
16  
17  
18  
19  
20  
21  
22  
23  
24  
25  
26  
27  
28  
29

Phylogenetic, population genetic, and morphological analyses reveal evidence for  
one species of Eastern Indigo Snake (*Drymarchon couperi*)

Brian Folt<sup>1,6,¶</sup>, Javan Bauder<sup>2,3</sup>, Stephen Spear<sup>2,4</sup>, Dirk Stevenson<sup>2</sup>, Michelle Hoffman<sup>5</sup>, Jamie R.  
Oaks<sup>1</sup>, Christopher Jenkins<sup>2</sup>, David A. Steen<sup>1</sup>, and Craig Guyer<sup>1,¶</sup>

<sup>1</sup>Department of Biological Sciences and Auburn University Museum of Natural History, 331 Funchess Hall, Auburn University, Alabama 36849, U.S.A.

<sup>2</sup>The Orianne Society, 11 Fruitstand Lane, Tiger, Georgia 30576, U.S.A.

<sup>3</sup>Department of Environmental Conservation, University of Massachusetts, Amherst, Massachusetts, U.S.A.

<sup>4</sup>The Wilds, Cumberland, Ohio, U.S.A.

<sup>5</sup>The Orianne Center for Indigo Conservation, Central Florida Zoo and Botanical Gardens, 3755 NW Hwy 17-92, Sanford, Florida, 32771, U.S.A.

<sup>6</sup>Corresponding author; e-mail: [brian.folt@gmail.com](mailto:brian.folt@gmail.com)

<sup>¶</sup>These authors contributed equally to this work.

## 30 **Abstract**

31 Accurate species delimitation and description are necessary to guide effective conservation  
32 management of imperiled species. The Eastern Indigo Snake (*Drymarchon couperi*) is a large  
33 species in North America that is federally-protected as Threatened under the Endangered Species  
34 Act. Recently, two associated studies hypothesized that *Drymarchon couperi* is two species.  
35 Here, we use diverse approaches to test the two-species hypothesis for *D. couperi*. Our analyses  
36 reveal that (1) phylogenetic reconstruction in previous studies was based entirely on variance of  
37 mitochondrial DNA sequence data, (2) microsatellite data demonstrate significant population  
38 admixture and nuclear gene flow between mitochondrial lineages, and (3) morphological  
39 analyses recover a single diagnosable species. Our results are inconsistent with the two-species  
40 hypothesis, thus we reject it and formally place *Drymarchon kolpobasileus* into synonymy with  
41 *D. couperi*. We suggest inconsistent patterns between mitochondrial and nuclear DNA may be  
42 driven by high dispersal of males relative to females. We caution against species delimitation  
43 exercises when one or few loci are used without evaluation of contemporary gene flow,  
44 particularly species with strong sex-biased dispersal (e.g., squamates) and/or when results have  
45 implications for ongoing conservation efforts.

46

## 47 **Introduction**

48 Accurate species delimitation and description are critical not only for understanding  
49 global patterns of biodiversity, but also to guide effective conservation strategies [1–4]. For  
50 example, species are often delimited into multiple species on the basis of systematic studies

51 utilizing molecular genetic data, thereby requiring adjustment of existing conservation  
52 management plans (e.g., [5]). When species delimitation methods fail to correctly diagnose  
53 individuals (*sensu* [6]), such errors can have significant consequences for conservation and  
54 management of imperiled species by reducing or diverting finite conservation resources [2].  
55 Therefore, taxonomic division into multiple species should be performed carefully and only  
56 when robust evidence supports a decision to revise. Indeed, authors have cautioned that studies  
57 of species delimitation should be conservative, because “it is better to fail to delimit species than  
58 it is to falsely delimit entities that do not represent actual evolutionary lineages” [7].

59         The Eastern Indigo Snake (*Drymarchon couperi*) is a large colubrid native to the Coastal  
60 Plain of the southeastern United States. However, *D. couperi* populations have declined in  
61 abundance precipitously over the last century, largely due to habitat loss, habitat fragmentation,  
62 and historical over-collecting for the pet trade [8,9]. As a result of these declines, *D. couperi* is  
63 listed as Threatened under the U.S. Endangered Species Act [9,10]. Potentially viable  
64 populations of *D. couperi* remain in large contiguous habitats in southeastern Georgia [11–13],  
65 and throughout peninsular Florida [13,14], but the species was likely extirpated from  
66 Mississippi, Alabama, and the Florida panhandle [13].

67         Current conservation management plans for *D. couperi* were developed under the  
68 hypothesis that *D. couperi* represents a single species. However, this hypothesis was recently  
69 challenged by Krysko et al. [15], who used DNA sequence analyses to describe two genetic  
70 lineages of *D. couperi* – an Atlantic lineage, including populations in southeastern Georgia and  
71 eastern peninsular Florida, and a Gulf lineage of populations in western and southern peninsular  
72 Florida and the Florida panhandle. This phylogeographic study was followed by a second paper  
73 [16] that analyzed morphological variation between the Atlantic and Gulf lineages and provided

74 an official description of the Gulf lineage as a purported novel species, the Gulf Coast Indigo  
75 Snake (*Drymarchon kolpobasileus*).

76         Given the conservation status of *D. couperi* (*sensu lato*), these results have potentially  
77 important consequences for the conservation of Eastern Indigo Snakes. First, division of *D.*  
78 *couperi* (*sensu lato*) into two smaller-ranged species results in two species with substantially  
79 smaller population sizes that are, therefore, at greater risk of extinction (*sensu* [2]; e.g., [17]).  
80 Second, conservation and recovery of two rare species requires more time and funds than one,  
81 and both resources are in short supply. Finally, as noted by Krysko et al. [15], active  
82 conservation management plans for *D. couperi* (*sensu lato*) include population repatriation  
83 projects in Alabama and the Florida panhandle, where populations attributed to the Gulf lineage  
84 presumably were extirpated. Repatriation projects should be informed by phylogeographic and  
85 genetic developments [18]. The description of *D. kolpobasileus*, therefore, causes increased  
86 logistical complexity for Eastern Indigo Snake captive breeding and repatriation projects.

87         We represent additional experts on Eastern Indigo Snake taxonomy, ecology and  
88 conservation, many of whom participated in an inter-agency workshop on Eastern Indigo Snake  
89 taxonomy referenced in Krysko et al. [15,16]. During that event, consequences of the discovery  
90 that Eastern Indigo Snakes comprise two genetic lineages were debated, and this debate was used  
91 to inform conservation plans for the species. However, skepticism was voiced that the two  
92 lineages represent distinct evolutionary species, based largely on description of microsatellite  
93 data documenting widespread admixture of the lineages. Here, we formally address that debate  
94 to evaluate the hypothesis that *D. couperi* comprises two species [15,16]. We adopted a unified  
95 species concept [19,20] to define and operationally diagnose species. Under this concept, species  
96 are necessarily defined as independently evolving metapopulation lineages and this feature must

97 necessarily be demonstrated to delimit species [20]. However, we also evaluated additional lines  
98 of evidence, such as morphological diagnosability, to provide secondary assessments of lineage  
99 separation. Together, we sought to provide a conceptually robust and integrative test [21,22] of  
100 whether *D. couperi* is two distinct species.

101 In this paper, we first re-analyze gene sequence data presented by Krysko et al. [15] to  
102 infer whether their phylogeny was overly-influenced by data from the mitochondrial genome.  
103 Second, we analyze a novel microsatellite DNA dataset and test for evidence of population  
104 admixture and contemporary gene flow between the two genetic lineages identified by Krysko et  
105 al. [15] as an explicit test of whether there are two independently evolving metapopulation  
106 lineages of *D. couperi*. Specifically, if *D. couperi* is two species, we predicted little or no  
107 admixture between hypothetical species, particularly at the putative contact zone identified by  
108 Krysko et al. [15,16]. Third, we analyze new morphological data collected from 125 Eastern  
109 Indigo Snakes, including individuals from both genetic lineages of Krysko et al. [15,16].  
110 Specifically, we evaluate the diagnostic features of head and scale shape presented by Krysko et  
111 al. [16] as tests of whether morphological phenotypes are secondary lines of evidence supporting  
112 previously delimited species. Last, we review features of the life history of *D. couperi* and  
113 suggest how they inform interpretations of genetic and morphological data.

114

## 115 **Materials and Methods**

### 116 **Gene sequence analysis**

117 To infer evolutionary history among populations of *D. couperi* (*sensu lato*), Krysko *et al.*  
118 [15] analyzed sequence data obtained from three genetic markers: the linked mitochondrial  
119 (mtDNA) genes cytochrome *b* (CytB) and nicotinamide adenine dinucleotide dehydrogenase  
120 subunit 4 (ND4) and the nuclear gene *neurotrophin-3* (NT3). The authors estimated phylogenetic  
121 relationships among populations by analyzing a concatenated dataset including both  
122 mitochondrial and nuclear loci. These data were evaluated with maximum likelihood (ML) and  
123 Bayesian analyses; for the Bayesian analysis, the dataset was partitioned such that nucleotide  
124 substitution was modeled separately for each locus. Because both analyses generated similar  
125 phylogenetic hypotheses, the authors described results only from the Bayesian analysis.

126 Phylogenetic analyses of a single or few genetic loci frequently describe evolutionary  
127 patterns that do not reflect the organism's true evolutionary history (i.e., the gene tree/species  
128 tree problem; [1,23–25]). In particular, use of and reliance on mtDNA for phylogenetic and  
129 taxonomic analyses has been criticized because mtDNA has a vastly different natural history  
130 than the primary mode of genetic inheritance, nuclear DNA (nDNA). Mitochondrial DNA has a  
131 lower effective population size, higher mutation rate, and frequently defies critical assumptions  
132 of neutral evolution by being under selection [4,26]. More importantly, mtDNA is maternally  
133 inherited and, therefore, may not describe an organism's true patterns of inheritance expressed  
134 through the nuclear genome [26]. This is particularly problematic for species with relatively low  
135 dispersal rates that are more likely to show phylogeographic breaks that are not driven by  
136 decreased gene flow but by chance alone [27], or for species with intersexual differences in  
137 movement, site fidelity, or breeding behavior [28–30].

138 Given these and other limitations, a customary practice in phylogenetic studies is to use  
139 both mitochondrial and nuclear loci and to describe phylogenetic patterns inferred from these

140 two components of the genome separately (e.g., [24,31–33]). This practice can help identify  
141 situations for which phylogenetic hypotheses generated from mtDNA (1) are incongruent with  
142 hypotheses from the nuclear genome and that (2) might be erroneously assumed to accurately  
143 depict the species tree. However, Krysko *et al.* [15] combined the mitochondrial and nuclear  
144 markers and used that concatenated dataset to infer both ML and Bayesian phylogenies from the  
145 combined datasets. We therefore argue that the DNA sequence analyses of Krysko *et al.* [15] are  
146 biased toward describing patterns from maternally inherited mtDNA and require re-evaluation.

147 To explore the extent to which nuclear sequence data support lineage divergence and  
148 speciation within Eastern Indigo Snakes, we accessed the Krysko *et al.* [15] sequence data from  
149 GenBank (S1 Table) and used ML methods to infer a nuclear gene tree from the NT3 dataset,  
150 following the methods used by Krysko *et al.* [15]. This dataset included 23 *D. couperi* (*sensu*  
151 *lato*) samples (N = 13 Atlantic clade, N = 10 Gulf clade) and four outgroup taxa (*Drymarchon*  
152 *melanurus erebennus*, *Drymarchon melanurus rubidus*, *Coluber constrictor*, *Masticophis*  
153 *flagellum*). We fit different models of nucleotide substitution and ranked them using BIC; this  
154 procedure suggested that the Kimura [34] model best fit the data. We then estimated a ML  
155 phylogeny for NT3 using the package ‘phangorn’ [35] in the statistical Program R [36]. This  
156 method allowed us to test whether a phylogenetic pattern inferred from nuclear DNA alone was  
157 consistent with or different from a concatenated analysis of mitochondrial and nuclear DNA.

158

## 159 Microsatellite analysis

160 To test whether mitochondrial lineages of *D. couperi* represent independently evolving  
161 metapopulation lineages, we extracted and genotyped microsatellite DNA from 428 tissue

162 samples (scale, shed skins, or muscle from road-killed individuals) throughout peninsular Florida  
163 and southern Georgia. Twenty-five samples were obtained from the collections of the Florida  
164 Museum of Natural History, including 20 samples used in Krysko *et al.* [15]. The samples from  
165 Krysko *et al.* [15] included individuals from central Florida that represented both mitochondrial  
166 clades where they occur in close proximity. The remaining Florida samples (N = 170) were  
167 collected during field studies of *D. couperi* [37,38] in and around Highlands County or  
168 opportunistically by authorized project partners. The samples from Georgia (N = 233) were  
169 collected by multiple project partners as part of a study of population fragmentation in the state  
170 (S. Spear *et al.*, unpublished data). Our samples include similar representation of both  
171 mitochondrial lineages (55% Atlantic and 45% Gulf). We extracted DNA using the Qiagen  
172 DNeasy blood and tissue extraction kit (Qiagen, Inc., Valencia, CA). We ran 17 microsatellite  
173 loci [39] within three multiplexed panels using the Qiagen Multiplex PCR kit (S2 Table for  
174 details). Each reaction contained 1X Qiagen Multiplex PCR Master Mix, 0.2  $\mu$ M multiplexed  
175 primer mix (each primer at equal concentrations), and 1  $\mu$ l of DNA extract in a total volume of 7  
176  $\mu$ l. The PCR protocol was modified from Shamblin *et al.* [39] for multiplex PCR and consisted  
177 of an initial denaturation of 95°C for 15 min, 20 touchdown cycles of 94°C for 30 s, 60°C minus  
178 0.5°C per cycle for 90 s and 72°C for 1 min, followed by 30 cycles of 94°C for 30 s, 50°C for 90  
179 s and 72°C for 1 min, and a final elongation step of 60°C for 30 min. Multiplexed PCR products  
180 were run on a 3130xl Applied Biosystems Genetic Analyzer at the University of Idaho's  
181 Laboratory for Ecological, Evolutionary, and Conservation Genetics. We scored fragment sizes  
182 using Genemapper 3.7 (Applied Biosystems).

183 We tested for the presence of null alleles that would lead to violations of Hardy-  
184 Weinberg equilibrium assumptions using the software FreeNA [40] and excluded any loci that



185 had an estimated null allele frequency  $> 0.10$ . We estimated population structure and number of  
186 genetic clusters using the Bayesian clustering algorithm Structure 2.3.4 [41]. We used the  
187 admixture model with 100,000 iterations following 10,000 burn-in repetitions. We evaluated  $K =$   
188 1–10 with five replicates for each value of  $K$ . We used Structure Harvester [42] to implement the  
189 Delta  $K$  method of Evanno et al. [43] to estimate the number of clusters that best explain the  
190 microsatellite data. We used CLUMPP v.1.1.2. [44] to estimate the optimal cluster assignment in  
191 a single file based on the five replicates for the best supported values of  $K$ . Because the Evanno  
192 et al. [43] method analyzes changes in likelihood between values of  $K$ , it cannot estimate Delta  $K$   
193 for  $K = 1$ ; therefore, we assessed the probability of a  $K = 1$  scenario with the raw likelihood  
194 values from Structure. Given biases of methods to estimate population structure from  
195 microsatellite data [45], we sought to follow recommendations from Janes et al. [45] by  
196 describing and comparing population structure predicted by both the Delta  $K$  and raw likelihood  
197 outputs from Structure, while also reporting bar plot outputs for different values of  $K$  supported  
198 by those methods. We used the program CLUMPAK [46] to visualize bar plot outputs from  
199 Structure. We note that during these exploratory hierarchical analyses we observed additional  
200 fine scale genetic structure among populations; these details were outside the scope of the current  
201 analysis, but we intend to examine these data more fully in a future paper. Finally, we tested for  
202 evidence of population differentiation in the 20 samples used by Krysko *et al.* [15] that  
203 represented spatial overlap of Atlantic and Gulf clades by estimating Jost's  $D$  metric of genetic  
204 differentiation [47]. Jost's  $D$  was developed to better represent actual levels of genetic  
205 differentiation when markers with high mutation rates (such as microsatellites) are used. We  
206 estimated Jost's  $D$  using the 'mmod' package [48] in R.

207 We also conducted a spatial principle components analysis (sPCA) to identify spatial  
208 patterns of genetic structure while accounting for spatial autocorrelation among samples without  
209 relying on assumptions of Hardy-Weinberg equilibrium [49]. sPCA requires specifying a  
210 connection network to define connected samples. We evaluated three connection networks: (1)  
211 Delaunay triangulation, (2) Gabriel graph, and (3) a distance-based connection network, where  
212 samples  $\leq 22.2$  km (the maximum known dispersal distance by Eastern Indigo Snakes; [50])  
213 were considered connected. We conducted significance tests for global and local structure using  
214 9,999 permutations in the package ‘adegenet’ [51] in R.

215 Last, we analyzed the microsatellite data using linear mixed-effects models with  
216 maximum-likelihood population effects (MLPE; [52]) to better understand the role of isolation  
217 by distance in explaining genetic distance within and among clades. We estimated genetic  
218 distance at the individual level using  $1 - \text{proportion of shared alleles}$  [53], where increased values  
219 indicated greater genetic dissimilarity between samples. To test for isolation by distance, we  
220 built three MLPE models examining how genetic distance varied by Euclidean geographic  
221 distance: a model using only Atlantic clade samples, a model using only Gulf clade samples, and  
222 a model using all sample from both clades. For each model, we report the parameter estimate for  
223 Euclidean distance, it’s standard error and  $t$  statistic, and the marginal  $R^2$  (i.e., the proportion of  
224 variance explained by fixed-effect factors; [54,55]). To visualize how isolation by distance  
225 differed within and between clades, we graphically overlaid genetic distance against Euclidean  
226 distance for within-clade distances against genetic distances measured between clades to see how  
227 isolation by distance varied within clades relative to across all samples. If mitochondrial lineages  
228 represented different species, we predicted to observe lower genetic distances within clades than  
229 between clades (i.e., no or little overlap in genetic distances within and among clades). We

230 estimated proportion of shared alleles using the package ‘adegenet’ [51] and implemented MLPE  
231 tests with individuals as random effects using the package ‘ResistanceGA’ [56] in R.

232

## 233 Morphological analysis

234 Krysco et al. [16] performed principal components analyses (PCA) on five linear  
235 measurements of head morphology: head length, head height, length of a temporal scale, length  
236 of the 7<sup>th</sup> infralabial, and width of the 7<sup>th</sup> infralabial. Head length, head height, and 7<sup>th</sup> infralabial  
237 length loaded positively and 7<sup>th</sup> infralabial width loaded negatively on the first principal  
238 component, which explained 44.7% of variance. This axis separated specimens that were  
239 described to be long- and wide-headed with long and narrow 7<sup>th</sup> infralabials (high PC1 scores;  
240 almost exclusively Atlantic lineage snakes) from specimens that were described to be short and  
241 narrow-headed with short and wide 7<sup>th</sup> infralabials (low PC1 scores; almost exclusively Gulf  
242 lineage snakes). Temporal length loaded heavily and positively on the second principal  
243 component, which explained 25.4% of variance and separated specimens with relatively elongate  
244 temporals (high values on PC2; primarily Atlantic lineage) from specimens with relatively short  
245 temporals (low values on PC2; primarily Gulf lineage). The authors then used these axes to  
246 justify presentation of the shape of the 7<sup>th</sup> infralabial, temporal, and head as being diagnostic of  
247 each species.

248 We found inconsistencies in the head scale and shape characters measured by Krysco et  
249 al. [16], which caused us to question their validity as diagnostic features. In particular, the  
250 specific temporal scale identified as being measured differed between Figures 3 and 5 of Krysco  
251 et al. [16]. This resulted because the number and position of temporal scales within species of

252 *Drymarchon* is variable (Fig 1). Similarly, Figure 3 of Krysko et al. [16] appears to identify the  
253 6<sup>th</sup> infralabial rather than the 7<sup>th</sup> as the scale measured for multivariate analysis. Thus, it is  
254 unclear which scale was measured for this important character and whether the same scale was  
255 measured among all individuals included in analysis.

256 Fig 1. Head scale patterns in Eastern Indigo Snakes (*Drymarchon couperi*). A) 2+2 condition of  
257 temporals (I = dorsal anterior temporal; II = ventral anterior temporal; III = dorsal posterior  
258 temporal; IV = ventral posterior temporal) and position of 4<sup>th</sup>, 5<sup>th</sup>, 6<sup>th</sup>, and 7<sup>th</sup> infralabials; B)  
259 3<sub>v</sub>+2 condition of temporals (extra ventral temporal shaded); C) 4+2 condition of temporals  
260 (extra dorsal and ventral temporals shaded); D) 3<sub>d</sub>+2 condition of temporals (extra dorsal  
261 temporal shaded).

262 To better understand whether morphological variation provides secondary support for  
263 lineage divergence and speciation of *D. couperi*, we examined 114 individuals housed at the  
264 Orianna Center for Indigo Conservation, a sample that included 68 and 17 specimens from the  
265 Atlantic and Gulf lineages of Krysko et al. [15], respectively, along with 4 specimens of  
266 unknown lineage assignment, 12 specimens derived from F1 hybrids of Atlantic and Gulf lineage  
267 snakes, and 13 hybrids of Atlantic lineage snakes crossed with adults of unknown origin. Lateral  
268 or dorsolateral photos of the head were taken of each specimen, including a millimeter ruler for  
269 scale. The photos were used to record the condition of the temporal scales for each specimen.  
270 Four categories were recognized based on the number and position of temporal scales (Fig 1).  
271 We generated a contingency table providing counts of specimens in each of the four categories  
272 for each lineage, specimens of unknown lineage, and hybrids. Fisher's exact test was used to  
273 determine whether the relative proportions of temporal scale categories differed between the  
274 Atlantic and Gulf lineages. Additionally, we measured total head length (posterior-most point of

275 8<sup>th</sup> supralabial to anterior tip of rostral; N = 111), head height (only for photos in lateral aspect; at  
276 level of anterior-most point of parietal suture; N = 35), and length of the dorsal posterior  
277 temporal (intersection of ventral posterior temporal, dorsal posterior temporal, and adjacent first  
278 dorsal scale to intersection of ventral posterior temporal, dorsal posterior temporal, and adjacent  
279 ventral temporal; N = 111). All distances were measured using Adobe Photoshop 6.0 with  
280 reference to the photographed ruler. We used an analysis of covariance (ANCOVA) to test  
281 whether the linear relationship between head length and head height differed between Atlantic  
282 and Gulf lineages. We divided the length of the dorsal posterior temporal by head length to  
283 control for effects of body size and used an analysis of variance to test whether temporal length  
284 differed among the four categories of temporal scales.

285         We also examined 11 preserved specimens in the Auburn University Museum (AUM)  
286 collections. These snakes were from southeastern Georgia and presumed to belong to the  
287 Atlantic lineage. For these specimens, we measured length and width of the 6<sup>th</sup> and 7<sup>th</sup> infralabial  
288 scales with dial calipers. We measured both scales because it was not clear which of these was  
289 measured by Krysko et al. [16] and because they represent the position of the 7<sup>th</sup> lower labial  
290 scale if the mental scale was included and if it was excluded. Additionally, we used photos of the  
291 type specimens presented in Krysko et al. [16] to determine length and width of the 6<sup>th</sup> and 7<sup>th</sup>  
292 infralabial scales using Adobe Photoshop 6.0. A length-to-width ratio was then calculated for  
293 each specimen. Mean differences between 6<sup>th</sup> and 7<sup>th</sup> infralabials were tested with a paired t-test.  
294 Differences between our sample of Atlantic lineage snakes and the type specimens was  
295 determined by visual inspection. We used SAS v.9.4 for all analyses (SAS Institute, Inc., 2008)  
296 with  $\alpha = 0.05$ .

## 297 Ethics Statement

298 The use of live snakes for research was approved by Auburn University IACUC protocols (PRN  
299 2007-1142, 2010-1750, 2013-2386, 2017-3102) and a federal research permit from the United  
300 States Fish and Wildlife Service (TE32397A-O).

301

## 302 **Results**

### 303 Gene sequence analysis

304 We found that the nuclear locus NT3 was completely invariant across all *D. couperi*  
305 specimens, and thus NT3 had no variable sites for phylogenetic inference of *D. couperi*. As  
306 expected, the inferred ML phylogeny estimated a polytomy (Fig 2), indicating a lack of  
307 phylogenetic structure among individuals from the two mitochondrial lineages of *D. couperi*  
308 (*sensu lato*) [15]. Specimens of *D. melanurus erebennus* and *D. melanurus rubidus* clustered as  
309 sister taxa to the exclusion of all *D. couperi* specimens when rooted by *Coluber constrictor* +  
310 *Masticophis flagellum*.

311 Fig 2. Maximum likelihood phylogeny among samples of Eastern Indigo Snakes (*Drymarchon*  
312 *couperi, sensu lato*) and outgroups (*Drymarchon melanurus, Coluber constrictor, Masticophis*  
313 *flagellum*), as inferred from sequence data from the nuclear gene *neurotrophin-3* (NT3). Indigo  
314 snakes are labeled by GenBank accession numbers and are classified by the lineages identified  
315 by Krysko et al. [15]. Taxon labels: blue = Atlantic lineage, orange = Gulf lineage).

316

### 317 Microsatellite analysis

318 We found evidence for null alleles in three loci (Dry33, Dry63, and Dry69). Therefore,  
319 we eliminated these loci from further analysis and retained the remaining 14 loci. Delta K was  
320 maximized at  $K = 2$  (Fig 3) and supported two genetic clusters: one associated with the northern-  
321 most samples, and a second with the southern-most samples. However, there was extensive  
322 admixture between the two clusters, particularly in central Florida (Fig 4; Fig 5). For the 20  
323 samples from Krysko et al. [15], including representatives from Atlantic and Gulf lineages, we  
324 found all individuals were assigned to our southern cluster, and all were highly admixed with the  
325 northern cluster (0.66 assignment to the southern cluster for the Gulf clade and 0.57 assignment  
326 to southern cluster for the Atlantic clade). Furthermore, the Jost's D value for these 20 samples  
327 was extremely small (0.0004), indicating no genetic differentiation among samples at the  
328 putative contact zone. Raw likelihood values from Structure began to plateau at  $K = 3$  (Fig 3),  
329 and we interpreted this as support for three populations: a cluster of the southern samples, but  
330 described further population subdivision of the northern samples into two clusters.

331 Fig 3. Plot of Delta K (A) and likelihood scores (B) used to identify the most likely number of  
332 population clusters across the range of *Drymarchon couperi* using the Bayesian algorithm  
333 Structure [43]. The dashed line in (A) indicates Delta K = 0; the error bars in (B) indicate S.D.

334 Fig 4. Bar plots of population clustering estimated through the Bayesian clustering algorithm  
335 Structure with (A)  $K = 2$  and (B)  $K = 3$ . The y-axis is the proportion of individual ancestry for  
336 each cluster; in the x-axis, group 1 represents individuals assigned or assumed to be within the  
337 Atlantic mitochondrial clade, and group 2 represents individuals assigned or assumed to be in the  
338 Gulf mitochondrial clade. Within each group, individuals are sorted by latitude. (A)  $K = 2$ ; blue  
339 indicates alleles from the northern population cluster, and orange indicates alleles from the

340 southern population cluster. (B)  $K = 3$ ; purple and blue indicate alleles from two northern  
341 population clusters, and orange indicates alleles from the southern population cluster.

342 Fig 5. Maps of sampling sites represented as pie charts of percent ancestry within population  
343 clusters identified by Structure analyses. (A)  $K = 2$  populations, with the southern cluster  
344 represented as black and the northern cluster as gray; (B)  $K = 3$  populations, with the southern  
345 cluster as black and two northern populations as grey and white. Lines indicate state boundaries  
346 in the southeastern U.S.A. Pie charts for both panels are colored as in Fig 4.

347 Inferences about spatial genetic structure were very similar among the three connection  
348 networks we used, so we report the results using the distance-based connection network (see SI  
349 Figures S1 and S2 for results using the Delaunay triangulation network). Lagged scores from the  
350 first two PC axes were highly correlated between different connection networks ( $r \geq 0.93$ ). The  
351 global test was significant (observed = 0.0222,  $P < 0.0001$ ) while the local test was not (observed  
352 = 0.0064,  $P = 0.84$ ). The first PC axis explained the most variation followed by the second PC  
353 axis (0.2978 and 0.1533, respectively; all other axes  $\leq 0.1002$ ; SI Figure S3) and both axes  
354 showed positive spatial autocorrelation (Moran's  $I = 0.83$  and 0.74, respectively; SI Figure S3).  
355 The lagged scores of the first axis suggested genetic structure followed a north-south gradient,  
356 while the second axis suggested strongest genetic structure within southern Georgia and between  
357 Georgia and Florida (Fig 6). There was no consistent differentiation between samples from  
358 different lineages and relatively substantial overlap across the putative contact zone.

359 Fig 6. Spatially lagged scores for each sample from the first (A) and second (B) axes of a spatial  
360 principle components analysis (sPCA). Atlantic clade samples are displayed using circles while  
361 Gulf clade samples are displayed using squares. Samples with more extreme values/colors are  
362 more genetically differentiated.



363 MLPE models described strong effects of Euclidean distance on genetic distance among  
364 samples. Specifically, we observed significant effects of Euclidean distance on genetic distance  
365 within the Atlantic clade ( $\beta = 0.05$ ,  $SE = 0.0007$ ,  $t = 65.5$ ,  $R^2 = 0.21$ ), the Gulf clade ( $\beta = 0.07$ ,  
366  $SE = 0.001$ ,  $t = 48.6$ ,  $R^2 = 0.34$ ), and among all samples ( $\beta = 0.04$ ,  $SE = 0.0003$ ,  $t = 148.8$ ,  $R^2 =$   
367  $0.18$ ). When comparing genetic distance within and between mitochondrial clades, values within  
368 clades overlapped greatly with values observed among all samples between clades (Fig 7).

369 Fig 7. Plots of pairwise genetic distance (1 - proportion of shared alleles) against Euclidean  
370 distance (km) showing positive isolation by distance. Solid lines show the predicted pattern of  
371 isolation by distance from a linear mixed-effects model with maximum-likelihood population  
372 effects (MLPEs; [52]). (A) Pairwise distances within Atlantic clade samples; (B) pairwise  
373 distances within Atlantic clade samples (gray circles) and among samples from both Atlantic and  
374 Gulf clades (white circles); (C) pairwise distances within Gulf clade samples; (D) pairwise  
375 distances within Gulf clade samples (gray circles) and among samples from both Atlantic and  
376 Gulf clades (white circles).

377

## 378 Morphological analysis

379 We observed four categories of temporal scales from both Atlantic and Gulf lineages  
380 (Table 1). In 22% of specimens, temporals conformed to the 2+2 formula that Krysko et al. [16]  
381 described as being invariant (Fig 1A). We found that 38% of specimens exhibited an extra  
382 ventral temporal (Fig 1B), 26% of specimens had extra dorsal and ventral temporals (Fig 1C),  
383 and 14% of specimens exhibited an extra dorsal temporal (Fig 1D). The frequency with which  
384 these four categories occurred differed between Atlantic and Gulf lineage specimens (Table 2; df

385 = 3; Fisher's Exact  $P = 0.006$ ), with Atlantic lineage snakes tending to have two dorsal temporals  
386 and Gulf lineage snakes tending to have three dorsal temporals. Head shape, based on ANCOVA  
387 of head width on head length, did not differ between Atlantic and Gulf lineages in either slope  
388 (Fig 8;  $F = 0.07$ ;  $df = 1$ ;  $P = 0.79$ ) or intercept ( $F = 0.48$ ;  $df = 1$ ;  $P = 0.49$ ). Length of the dorsal  
389 posterior temporal, expressed as a proportion of head length, differed significantly among  
390 temporal categories ( $F = 18.34$ ;  $df = 3$ ;  $P < .0001$ ), with the dorsal posterior temporal being  
391 proportionately shorter when three dorsal temporal scales are present relative to when two dorsal  
392 temporal scales are present (Fig 9).

393 Table 1. Frequency of occurrence of two and three dorsal temporal scales (DTs) between the  
394 Atlantic and Gulf lineages of Eastern Indigo Snakes.

| <u>Mitochondrial Clade</u> | <u>Scale Condition</u> |                   |                   |     |
|----------------------------|------------------------|-------------------|-------------------|-----|
|                            | 2+2                    | 3 <sub>v</sub> +2 | 3 <sub>d</sub> +2 | 4+2 |
| Atlantic                   | 14                     | 30                | 11                | 13  |
| Gulf                       | 5                      | 1                 | 2                 | 9   |
| Atlantic x Gulf            | 2                      | 5                 | 1                 | 4   |
| Atlantic x Unknown         | 2                      | 6                 | 1                 | 4   |
| Unknown                    | 1                      | 2                 | 1                 | 0   |

395

396 Fig 8. Bivariate plot of head height on head length. Values from Atlantic lineage indicated by  
397 solid circles and solid line; values from Gulf lineage indicated by open circles and dashed line.

398 Fig 9. Box and whiskers plot of distribution of ratio of dorsal posterior temporal scale length to  
399 head length in four categories of temporal scales (see Fig 1). Vertical lines indicate range; box  
400 indicates interquartile, horizontal line indicates median; open diamond indicates mean.

401 When the length and width of the 6<sup>th</sup> and 7<sup>th</sup> infralabial scales were converted to a length-  
402 to-width ratio, the distribution of our sample of scales from Atlantic lineage snakes encompassed

403 values for both type specimens for each scale (Fig 10). Length-to-width ratios differed between  
404 6<sup>th</sup> and 7<sup>th</sup> infralabials ( $t = 8.07$ ;  $df = 12$ ,  $P < .0001$ ), with 7<sup>th</sup> infralabials being more elongate  
405 than 6<sup>th</sup> infralabials.

406 Fig 10. Distribution of length-to-width ratio of 6<sup>th</sup> and 7<sup>th</sup> infralabials in 11 Atlantic lineage  
407 specimens of *Drymarchon couperi* (dark spots). Open triangles indicate ratios from type  
408 specimen of *D. couperi* (Atlantic lineage); open diamonds indicate ratios from type specimen of  
409 *D. kolpobasileus* (Gulf lineage).

410

## 411 **Discussion**

### 412 Gene sequence analysis

413 We found no variation of the nuclear NT3 locus in sequences generated by Krysko et al.  
414 [15]. These authors included this locus because it “potentially represents an informative, single-  
415 copy, unlinked locus that is likely evolving at a different rate than mtDNA (mitochondrial)  
416 genes” (p. 114). From this we infer that the authors expected this nuclear gene to corroborate  
417 patterns generated from mtDNA, solidifying their conclusion that two species are present.  
418 However, if the locus was expected to be informative (i.e., *sensu* [57]), then the fact that it is  
419 invariant indicates that it (1) does not support population structure consistent with two genetic  
420 populations (i.e., two species), (2) was not necessary to include it in the study, and (3) only  
421 served to restrict phylogenetic inference to the mitochondrial genome and its inherent problems.  
422 From a statistical perspective, the only effect of including NT3 in their analysis was a slight  
423 reduction of branch lengths due to the sequence’s invariance. For these reasons, we suggest that

424 the gene sequence data do not provide compelling evidence in support of two distinct species of  
425 *D. couperi* (*sensu lato*).

426

## 427 Microsatellite analysis

428 Our population genetic analyses found evidence of population structure within Eastern  
429 Indigo Snakes, particularly along a north-south gradient and between southern Georgia and  
430 peninsular Florida. However, patterns of microsatellite genetic structure reveal substantial  
431 differences from the phylogenetic structure inferred from Krysko et al. [15]. First, the geographic  
432 pattern of our population clusters suggests a north-south orientation rather than the Gulf-Atlantic  
433 orientation suggested by mtDNA. Second, and most importantly, our Structure and sPCA  
434 analyses document widespread contemporary admixture of alleles from the northern and  
435 southern populations. Admixture occurs across the entire range of *D. couperi* (*sensu lato*) and  
436 cannot be characterized as a narrow hybrid zone. While our MLPE analyses found support for  
437 isolation by distance both across all samples and within each mtDNA clade, those analyses also  
438 found high degree of overlap in genetic distance within and between clades, an observation that  
439 we view as inconsistent with a two-species hypothesis. Further, our sPCA results, which  
440 accounted for spatial autocorrelation among samples, are consistent with isolation by distance  
441 along a north-south gradient and are not consistent with the statement by Krysko et al. [15] that  
442 the two lineages of have “near discrete geographic distributions” (p. 118) and that “dispersal  
443 between lineages is too low to influence demographic processes” (p. 119). Rather, our results  
444 indicate high levels of contemporary gene flow, and we instead suggest that genetic structure  
445 among populations is best described as continuous isolation by distance rather than discrete

446 evolutionary lineages. While isolation by distance is possible across two discrete clusters [58],  
447 multiple analyses of genetic variation within our microsatellite data, including our sPCA which  
448 accounts for spatial autocorrelation among samples, nevertheless did not correspond to the  
449 genetic lineages recognized by Krysko et al. [15,16]. Together, we interpret the microsatellite  
450 results as failure to support the presence of two discrete evolutionary metapopulations with little  
451 or no admixture, the necessary criterion for the existence of two species [20]. Thus, we view  
452 these data as sufficient to reject the two-species hypothesis, and we suggest the available data are  
453 most consistent with the existence of a single evolutionary species, *D. couperi*.

454         The North American Coastal Plain is a global biodiversity hotspot [59]. In particular,  
455 peninsular Florida has a high proportion of endemic species (e.g., snakes: [60–62]), which are  
456 likely a product of refugial isolation on islands during periods of elevated sea level in recent  
457 epochs and contemporary drainage-driven endemism [63,64]. However, our case study with *D.*  
458 *couperi* adds to a growing number of examples of Florida organisms that appear, based on  
459 modeling of one or few genetic loci, to represent species that are distinct from other mainland  
460 counterparts, but for which microsatellite or similar data demonstrate substantial gene flow.  
461 Burbrink and Guiher [60] estimated that there was such low gene flow between cottonmouths  
462 (*Agkistrodon piscivorus*) in Florida and the mainland that speciation must have occurred between  
463 those two regions, a hypothesis immediately contested by data from Strickland et al. [65] who  
464 detected a broad geographic range of admixture using AFLP markers. Similarly, Thomas et al.  
465 [66] described alligator snapping turtles (*Macrochelys temminckii*) from the Apalachicola River  
466 and adjacent rivers to be a distinct species, despite microsatellite data from Echelle et al. [67]  
467 that are inconsistent with this conclusion [68]. In a similar example, Gordon et al. [69] used

468 mtDNA to describe a population of *Anaxyrus boreas* in the western United States as a distinct  
469 species, but this conclusion was contested by microsatellite analysis of gene flow [70].

470         We believe this emerging pattern along with a concept of species as evolutionary  
471 metapopulation lineages [20] can guide us toward a more rigorous framework for species  
472 delimitation. While analyses of one or few genetic loci can be informative by revealing apparent  
473 monophyly, they should not be viewed as sufficient to diagnose and delimit species, because of  
474 high error rate associated with the gene tree/species tree problem [24,25]. This issue is  
475 particularly acute when relying on mtDNA [4,26]. We suggest that authors be required to meet  
476 the necessary criterion of the unified species concept – that species are independently evolving  
477 metapopulations lineages – by demonstration of little or no contemporary gene flow across  
478 lineage populations using a multi-locus or genomic dataset. We note that Krysko et al. [16] also  
479 used the unified species concept [20] as a framework to define species; while details about how  
480 they operationally diagnosed species were not clear, it appears that they relied on evaluation of  
481 reciprocal monophyly of mtDNA. While monophyly can be used as secondary criterion under  
482 the metapopulation lineage concept [20], for the reasons outlined above we suggest authors  
483 should evaluate monophyly in conjunction with analyses of contemporary gene flow and  
484 population admixture, particularly when monophyly is evaluated with small numbers of loci.

485

## 486 Morphological analysis

487         Contrary to the results presented in Krysko et al. [16], we rejected the hypothesis that the  
488 Atlantic and Gulf lineages are identifiable entities revealed by morphology. We reached this  
489 conclusion after re-examining the variables used by Krysko et al. [16] to diagnose each lineage.

490 Of the disparities that emerge between our analyses and theirs, the conformation of the  
491 infralabials is the most problematic. The figures presented by Krysko et al. [16] for the 6<sup>th</sup>  
492 infralabial show great promise for diagnosing lineages, and separation of the lineages along PC1  
493 of their analysis seems to provide statistical support for this character. However, we were struck  
494 by how dissimilar Atlantic specimens appeared to be from the scale shape ascribed to them by  
495 Krysko et al. [16]. Our analyses demonstrate that the 6<sup>th</sup> and 7<sup>th</sup> infralabials differ in shape, that  
496 the shape of the 7<sup>th</sup> infralabial conforms to the shape ascribed to the Atlantic lineage, and that the  
497 shape of the 6<sup>th</sup> infralabial conforms to that ascribed to the Gulf lineage. It is unclear which of  
498 these scales was measured by Krysko et al. [16] and we found that the range of variation of each  
499 scale within a sample of Atlantic lineage snakes encompasses both type specimens. One potential  
500 explanation for this discrepancy is that Krysko et al. [16] intended to measure the 7<sup>th</sup> infralabial  
501 but inadvertently measured the 6<sup>th</sup> for Gulf lineage specimens and the 7<sup>th</sup> for Atlantic lineage  
502 specimens, perhaps because the mental scale sometimes was included in counts and other times  
503 was not. Otherwise, we are left with a PCA that separates lineages based on one of the two  
504 possible scales, but a univariate analysis that fails to confirm these lineages.

505 Our results for the temporal scale reveal great variation in the number of these scales  
506 present in Eastern Indigo Snakes. The four categories that characterize this variation are found in  
507 both Atlantic and Gulf lineage snakes, indicating that this feature is not diagnostic. Nevertheless,  
508 Atlantic lineage snakes tend to have two dorsal temporals, while Gulf lineage snakes tend to  
509 have three. We assume that Krysko et al. [16] intended to measure the dorsal posterior temporal  
510 and, therefore, we focused our attention on this scale. Our data indicate that the length of the  
511 dorsal posterior temporal, relative to head length, becomes shortened if three dorsal temporals  
512 are present and becomes elongate if two dorsal temporals are present. This finding indicates that

513 the scale shapes revealed by PC2 of Krysko et al. [16] represent distinguishable groups, but these  
514 represent two phenotypes and not two species. We infer that the different morphologies of the  
515 dorsal posterior temporal result because, during embryonic development of some individuals, the  
516 dorsal anterior temporal divides, limiting space for development of the dorsal posterior temporal.

517 Krysko et al. [16] also used head shape to diagnose the two lineages. Relative head  
518 length and head height did load heavily on their PC1 axis and they used this to diagnose the  
519 Atlantic lineage as having an elongate wide head and to diagnose the Gulf lineage as having a  
520 short narrow head. Our bivariate examination of head length and height revealed no difference in  
521 head shape between the two lineages. We are unsure why our results differed from Krysko et al.  
522 [16], although we note that snake morphology can be difficult to measure consistently [71].  
523 Specimens preserved with mouths open are likely to have larger values for head height than  
524 those with mouths closed. If the relative frequency of open-mouthed versus closed-mouthed  
525 specimens differed between lineages, this might yield a spurious association of head shape with  
526 lineage. Our measurements were made from live specimens with closed mouths, which we  
527 assume reduces measurement error. If the lineages truly differ in head shape, our ANCOVA  
528 should have revealed this difference.

529

## 530 Natural history considerations

531 Our examination of genetic and morphological variation in *D. couperi* (*sensu lato*)  
532 demonstrates that the two-species hypothesis proposed by Krysko et al. [16] is not supported by  
533 available data. We offer several explanations for why true patterns of gene flow might result in a  
534 lack of genetic and morphological differentiation. First, *D. couperi* movements can be extensive,



535 especially for males. Male annual home range size is as large as ca. 1500 ha [72] and average ca.  
536 2.5–6.6 times larger than for females [72,73]. In fact, the disparity between male and female  
537 home range sizes becomes exacerbated in large snakes, a feature dominated by data from *D.*  
538 *couperi* (Fig 11; S3 Table). Within peninsular Florida, male *D. couperi* can move up to ca. 2 km  
539 in a single day and average movement distance in males is approximately twice that of females  
540 [38, D. Breining, unpublished data]. Furthermore, males within peninsular Florida increase  
541 their movement frequency, distance, and home range size during the breeding season [38,74].  
542 Dispersal distance of males may be 10 times that of females [75], with a small adult male in  
543 southern Georgia dispersing at least 22.2 km (straight line) over approximately two years [50].  
544 Fig 11. Bivariate plot of female home range area (ha) on male home range area for 25 studies of  
545 21 species of snakes (S3 Table). Open circles are data from *Drymarchon couperi*; closed circles  
546 are data from all other species of snakes. Dashed line is null expectation if male and female  
547 home range sizes are equal in size.

548         A second feature of *D. couperi* life history that reduces opportunity for speciation is the  
549 variety of habitats used by these animals throughout a year (e.g., [72]), particularly in peninsular  
550 Florida, where individuals will utilize habitats with varying degrees of anthropogenic disturbance  
551 [76]. This broad habitat use reduces the opportunity for ecological barriers to gene flow and is  
552 consistent with the high rates of gene flow indicated by our microsatellite analysis. Additional  
553 life history observations show that *D. couperi (sensu lato)* can cross fresh and saltwater features  
554 6–264 m wide [77; D. Stevenson, personal observation; D. Breining, unpublished data], and we  
555 note that traditional river barriers [63] do not appear to limit gene flow in these large snakes.  
556 While we do not doubt that a historical climatic event may have separated *D. couperi* into two  
557 populations [15], the observed levels of contemporary gene flow indicate that genetic

558 populations of *D. couperi* are in the process of merging back into a single evolutionary  
559 population (i.e., species), as has been observed for diverse taxa following climatic cycles [78].

560         Together, our knowledge of *D. couperi* movement patterns and life history allows us to  
561 hypothesize that limited female movement drives structure of the maternally-inherited mtDNA  
562 data presented by Krysko et al. [15], even though high levels of male movement drive extensive  
563 gene flow of the nuclear genome [79]. This life history-based model of intersexual variance in *D.*  
564 *couperi* gene flow is consistent with two other reptile systems for which life-history strategies  
565 generate contrasting patterns of gene flow among populations. First, female philopatry of  
566 Loggerhead Sea Turtles (*Caretta caretta*) causes structuring of mtDNA in the Atlantic Ocean,  
567 but high male dispersal drives significant nuclear gene flow among populations [80]. Second, a  
568 recent study of Neotropical snakes found active-foraging species to have greater rates of nuclear  
569 gene flow than ambush-predator species with more limited dispersal [81]. Last, and most  
570 relevant, many squamates are polygynous and are characterized by greater male dispersal  
571 relative to females [Fig 11; 82–85]; therefore, squamates typically have greater nuclear gene  
572 flow than that of the mitochondrion [79]. This pattern is also seen in waterfowl [28,30]. Thus, we  
573 suggest that *D. couperi* is similar to other reptile species in that life history provides explanations  
574 for why phylogeographic patterns from mtDNA are inconsistent with historical and/or  
575 contemporary patterns of nuclear DNA. Because of this incongruence and the high levels of  
576 recent gene flow among populations observed by our microsatellite analysis, we place  
577 *Drymarchon kolpobasileus* into synonymy with *D. couperi*. For now, we retain all Eastern  
578 Indigo Snakes within *D. couperi*, but note that the analysis of Krysko et al. [16] reveals that this  
579 species may not be diagnosable from *D. melanurus erebennus*.

580

## 581 Conservation implications

582 Eastern Indigo Snakes are now being released into the Conecuh National Forest of south-  
583 central Alabama and to the Apalachicola Bluffs and Ravines Reserve in the panhandle of  
584 Florida. Efforts to repatriate the species are the result of extensive collaborations and  
585 partnerships between state and federal agencies, as well as non-governmental conservation  
586 organizations. Initially, snakes used for release were to come from wild-caught gravid females  
587 taken from sites in southeastern Georgia, retained in captivity until they laid eggs, and then  
588 released at the point of capture. Eggs from these initial females then were to be hatched in  
589 captivity and raised for release at one of the two repatriation sites or donated to the Orianne  
590 Center for Indigo Conservation, where captive breeding from these and other donated animals  
591 was to occur, eventually replacing use of wild-captured females.

592 Those charged with implementing conservation planning for *D. couperi* welcome the  
593 opportunity to base those plans on the best published science. Many meetings were held among  
594 stakeholders and scientists, and, as Krysko et al. [15] noted, their preliminary molecular results  
595 [86] were presented at one of these early meetings as a challenge to the release of Atlantic  
596 lineage snakes at the two release sites. Here we describe why data from that preliminary report  
597 did not compel changes in the repatriation plan, and why continuation of that plan is unlikely to  
598 encounter the problems predicted by Krysko et al. [15].

599 A lack of apparently viable populations of Eastern Indigo Snakes in the Florida  
600 panhandle and southern Alabama and Mississippi was recognized as a significant gap in efforts  
601 to retain Eastern Indigo Snakes across its historic geographic range. This gap guided the choice  
602 of the two sites where repatriation was deemed reasonable [13]. Data from Krysko et al. [86]

603 were used to propose that only snakes of the Gulf lineage be used for repatriation because  
604 genetic information from two isolated samples from the panhandle of Florida were of this  
605 lineage. However, because Eastern Indigo Snakes were extirpated at both sites, discussions  
606 centered on how to deal with the uncertainty of which lineage historically occurred at each site  
607 and, therefore, which lineage(s) were appropriate to release at each site. This uncertainty  
608 recognized the fact that, for both sites, the 3<sup>rd</sup> and 4<sup>th</sup> closest localities currently occupied by  
609 Eastern Indigo Snakes have the Atlantic lineage. Additionally, the Atlantic lineage occurs in the  
610 Suwannee drainage, which empties into the Gulf of Mexico, further illustrating the uncertainty in  
611 identifying the location of the Gulf-Atlantic split and that both lineages are found in north  
612 Florida where they might serve as colonists for the release sites. Participants in these discussions  
613 were made aware of then-unpublished microsatellite data demonstrating widespread gene flow  
614 between lineages and observations from the zoo and herpetocultural communities documenting  
615 interbreeding of the two lineages with no apparent effects of outbreeding depression. While there  
616 is currently no evidence of ecological differences between Atlantic and Gulf lineage snakes,  
617 snakes from northern populations are known to differ markedly from southern populations in  
618 seasonal activity. Specifically, *D. couperi* in the latter region do not appear dependent upon  
619 Gopher Tortoise (*Gopherus polyphemus* Daudin 1802) burrows for winter refugia, likely because  
620 of milder winter temperatures [38,72,73,87,88]. As a result, use of snakes from similar latitudes  
621 appeared to be more important in ensuring successful repatriation than use of snakes from the  
622 same mitochondrial lineage. The majority of meeting participants therefore concluded that the  
623 wide movements of male *D. couperi* and broad habitat use of the species made matching of  
624 mitochondrial DNA lineages less important in guiding repatriation than matching spatial  
625 variation in ecology. Preservation of mitochondrial lineages was already achieved through

626 apparently viable populations at the northern and southern geographic extremes of *D. couperi*  
627 and release of snakes of one mitochondrial lineage into an area historically occupied by the other  
628 lineage was viewed simply as replicating patterns of gene flow observed throughout much of  
629 north and central Florida.

630 Because inferences from phylogenetic analyses of few loci can conflict with  
631 microsatellite-based analyses of contemporary admixture, we suggest that, at a minimum, both  
632 tools should be considered to adequately reveal recently diverged taxa. Additionally, we argue  
633 that a more-consistent voice from the community of systematists will emerge when life-history  
634 data are allowed to inform speciation models. For example, the potential for large snakes to  
635 move long distances as well as a difference in movement behavior between the sexes limit the  
636 utility of mitochondrial data alone to reveal novel species. We suspect this disparity in  
637 movement is rampant within squamates (e.g., [89]). Finally, species descriptions for which  
638 diagnoses merely report measures of variables that overlap widely among taxa (e.g., [16,66]) or  
639 that are not derived from results presented in the paper (e.g., [60]) should be rejected because  
640 they fail to provide further evidence that proposed taxa are identifiable as individuals. We point  
641 to papers that carefully meld phylogenetic and population genetic analyses [70,90,91] as  
642 improved examples of the process by which researchers might determine whether several  
643 populations have diverged sufficiently to be recognized as distinct species. Last, we suggest  
644 authors and reviewers be particularly critical of species descriptions without careful analysis of  
645 admixture or contemporary gene flow, because these papers may incorrectly delimit species,  
646 contribute to erroneous hyperdiversity, and confuse efforts to understand and conserve imperiled  
647 biodiversity.

648

## 649 **Acknowledgments**

650 We thank the Alabama Department of Conservation and Natural Resources, Auburn  
651 University College of Science and Mathematics, Orianna Society, and U.S. Fish and Wildlife  
652 Service for funding that made this study possible. We thank the Orianna Center for Indigo  
653 Conservation for allowing us access to the captive breeding collection of *D. couperi*, and we  
654 thank the Florida Museum of Natural History, M. Aldecoa, P. Barnhart, D. Ceilley, Z. Forsburg,  
655 G. Graziani, C. Lechowicz, J. Macey, S. Mortellaro, L. Paden, D. Parker, K. Ravenscroft, M.  
656 Ravenscroft, B. Rothermel, A. Safer, J. Sage, F. Snow, K. Stohlgren, M. Wallace, Sr., and J.  
657 Wasilewski for providing samples. Our manuscript benefitted greatly from comments made by  
658 anonymous reviewers. This paper is contribution no. [...] of the Auburn University Museum of  
659 Natural History.

660

## 661 **Author Contributions**

662 **Conceived and designed the experiments:** BF JB SS CG.

663 **Project coordination:** BF.

664 **Contributed reagents/materials/analysis tools:** JB SS CJ CG.

665 **Collected the data:** BF JB SP MH CG.

666 **Analyzed the data:** BF JB SS CG.

667 **Wrote the paper:** BF JB SS DS JRO DAS CG.

668

## 669 **Supporting Information**

670 S1 Fig. Results of spatial principle components analysis using a Delaunay triangulation  
671 connection network. The eigenvalues (left) for each axis where positive values indicate global  
672 structure and negative values indicate local structure, and the Moran's  $I$  (right) plotted against  
673 the variance for each axis.

674 S2 Fig. Additional results of spatial principle components analysis using a Delaunay  
675 triangulation connection network demonstrating the spatially lagged scores from the first (A) and  
676 second (B) axes. Atlantic clade samples are displayed using circles while Gulf clade samples are  
677 displayed using squares. Samples with more extreme values/colors are more genetically  
678 differentiated.

679 S3 Fig. Results of spatial principle components analysis using a distance-based connection  
680 network where samples are considered connected if they are within 22.2 km which is the  
681 maximum recorded dispersal distance for Eastern Indigo Snakes. The left figure shows the  
682 eigenvalues for each axis where positive values indicate global structure and negative values  
683 indicate local structure and the right figure shows the Moran's  $I$  plotted against the variance for  
684 each axis.

685 S1 Table. GenBank accession numbers for sequence data from the nuclear gene *neurotrophin-3*  
686 (NT3) from Krysko et al. [15] that were analyzed to generate Fig 2.

687 S2 Table. Multiplex PCR panels for *Drymarchon couperi* microsatellite loci. The names of loci  
688 are as in [39].

689 S3 Table. Citations for snake studies ( $N = 28$ ) describing intersexual variance in home range size  
690 (hectares) for 22 species of snakes used to generate Fig 9. See [92] for an earlier review of the  
691 topic.

692

## 693 **References**

- 694 1. Avise JC. A role for molecular genetics in the recognition and conservation of endangered  
695 species. *Trends Ecol Evol.* 1989;4: 279–281.
- 696 2. Agapow P-M, Bininda-Emonds OR, Crandall KA, Gittleman JL, Mace GM, Marshall JC,  
697 et al. The impact of species concept on biodiversity studies. *Q Rev Biol.* 2004;79: 161–  
698 179. doi:10.1086/383542
- 699 3. Mace GM. The role of taxonomy in species conservation. *Philos Trans R Soc Lond B Biol*  
700 *Sci.* 2004;359: 711–9. doi:10.1098/rstb.2003.1454
- 701 4. Frankham R, Ballou JD, Dudash MR, Eldridge MDB, Fenster CB, Lacy RC, et al.  
702 Implications of different species concepts for conserving biodiversity. *Biol Conserv.*  
703 Elsevier Ltd; 2012;153: 25–31. doi:10.1016/j.biocon.2012.04.034
- 704 5. Daugherty C, Cree A, Hay J, Thompson M. Neglected taxonomy and continuing  
705 extinctions of tuatara (*Sphenodon*). *Nature.* 1990;374: 177–179. doi:10.1016/0021-



- 706 9797(80)90501-9
- 707 6. Ghiselin M. *Metaphysics and the origin of species*. SUNY Press, editor. Albany, New  
708 York; 1987.
- 709 7. Carstens BC, Pelletier TA, Reid NM, Satler JD. How to fail at species delimitation. *Mol*  
710 *Ecol*. 2013;22: 4369–83. doi:10.1111/mec.12413
- 711 8. US Fish and Wildlife Service. Eastern indigo snake recovery plan. Atlanta, Georgia; 1982.
- 712 9. US Fish and Wildlife Service. Eastern Indigo Snake (*Drymarchon couperi*): 5-year  
713 Review-Summary and Evaluation. Jackson, MS; 2008.
- 714 10. US Fish and Wildlife Service. Endangered and Threatened Wildlife and Plants. Listing of  
715 the Eastern indigo snake as a threatened species. *Fed Regist*. 1978;43: 4026–4029.
- 716 11. Stevenson DJ, Enge KM, Carlile LD, Dyer KJ, Norton TM, Hyslop NL, et al. An Eastern  
717 Indigo Snake (*Drymarchon couperi*) mark-recapture study in southeastern Georgia.  
718 *Herpetol Conserv Biol*. 2009;4: 30–42.
- 719 12. Hyslop NL, Stevenson DJ, Macey JN, Carlile LD, Jenkins CL, Hostetler JA, et al.  
720 Survival and population growth of a long-lived threatened snake species, *Drymarchon*  
721 *couperi* (Eastern Indigo Snake). *Popul Ecol*. 2012;54: 145–156. doi:10.1007/s10144-011-  
722 0292-3
- 723 13. Enge KM, Stevenson DJ, Elliott MJ, Bauder JM. The historical and current distribution of  
724 the Eastern Indigo Snake (*Drymarchon couperi*). *Herpetol Conserv Biol*. 2013;8: 288–  
725 307.
- 726 14. Breininger DR, Legare ML, Smith RB. Eastern Indigo Snakes (*Drymarchon couperi*) in  
727 Florida: Influence of Edge Effects on Population Viability. *Ecosystems*. 2004.
- 728 15. Krysko KL, Nuñez LP, Lippi CA, Smith DJ, Granatosky MC. Pliocene-Pleistocene  
729 lineage diversifications in the Eastern Indigo Snake (*Drymarchon couperi*) in the  
730 Southeastern United States. *Mol Phylogenet Evol*. Elsevier Inc.; 2016;98: 111–122.  
731 doi:10.1016/j.ympev.2015.12.022
- 732 16. Krysko KL, Granatosky MC, Nuñez LP, Smith DJ. A cryptic new species of Indigo Snake  
733 (genus *Drymarchon*) from the Florida Platform of the United States. *Zootaxa*. 2016;4138:  
734 549–569.
- 735 17. Pauly GB, Piskurek O, Shaffer HB. Phylogeographic concordance in the southeastern  
736 United States: the flatwoods salamander, *Ambystoma cingulatum*, as a test case. *Mol Ecol*.  
737 2007;16: 415–29. doi:10.1111/j.1365-294X.2006.03149.x
- 738 18. Soltis PS, Gitzendanner MA. *Molecular Systematics and the Conservation of Rare*  
739 *Species*. *Conserv Biol*. 1999;13: 471–483.
- 740 19. de Queiroz K. Ernst Mayr and the modern concept of species. *Proc Natl Acad Sci U S A*.  
741 2005;102 Suppl: 6600–7. doi:10.1073/pnas.0502030102
- 742 20. de Queiroz K. *Species Concepts and Species Delimitation*. *Syst Biol*. 2007;56: 879–886.  
743 doi:10.1080/10635150701701083



- 744 21. Will KW, Mishler BD, Wheeler QD. The Perils of DNA Barcoding and the need for  
745 integrative taxonomy. *Syst Biol.* 2005;54: 844–851.
- 746 22. Dayrat B. Towards integrative taxonomy. *Biol J Linn Soc.* 2005;85: 407–415.  
747 doi:doi:10.1111/j.1095-8312.2005.00503.x
- 748 23. Funk DJ. Molecular systematics of cytochrome oxidase I and 16S from *Neochlamisus* leaf  
749 beetles and the importance of sampling. *Mol Biol Evol.* 1999;16: 67–82.
- 750 24. Funk DJ, Omland KE. Species-level paraphyly and polyphyly: frequency, causes, and  
751 consequences, with insights from animal mitochondrial DNA. *Annu Rev Ecol Evol Syst.*  
752 2003;34: 397–423. doi:10.1146/annurev.ecolsys.34.011802.132421
- 753 25. Dupuis JR, Roe AD, Sperling FAH. Multi-locus species delimitation in closely related  
754 animals and fungi: one marker is not enough. *Mol Ecol.* 2012;21: 4422–4436.  
755 doi:10.1111/j.1365-294X.2012.05642.x
- 756 26. Ballard JWO, Whitlock MC. The incomplete natural history of mitochondria. *Mol Ecol.*  
757 2004;13: 729–744. doi:10.1046/j.1365-294X.2003.02063.x
- 758 27. Irwin DE. Phylogeographic breaks without geographic barriers to gene flow. *Evolution*  
759 (NY). 2002;56: 2383–2394. doi:10.1554/0014-3820(2002)056[2383:pbwgbt]2.0.co;2
- 760 28. Scribner KT, Petersen MR, Fields RL, Talbot SL, Pearce JM, Chesser RK, et al. Sex-  
761 Biased Gene Flow in Spectacled Eiders (Anatidae): Inferences from Molecular Markers  
762 with Contrasting Modes of Inheritance. *Evolution (NY).* 2001;55: 2105–2115.
- 763 29. Johansson H, Surget-Groba Y, Thorpe RS. Microsatellite data show evidence for male-  
764 biased dispersal in the Caribbean lizard *Anolis roquet*. *Mol Ecol.* 2008;17: 4425–4432.  
765 doi:10.1111/j.1365-294X.2008.03923.x
- 766 30. Peters JL, Bolender KA, Pearce JM. Behavioural vs. molecular sources of conflict  
767 between nuclear and mitochondrial DNA: The role of male-biased dispersal in a Holarctic  
768 sea duck. *Mol Ecol.* 2012;21: 3562–3575. doi:10.1111/j.1365-294X.2012.05612.x
- 769 31. Gamble T, Berendzen PB, Bradley Shaffer H, Starkey DE, Simons AM. Species limits  
770 and phylogeography of North American cricket frogs (*Acris*: Hylidae). *Mol Phylogenet*  
771 *Evol.* 2008;48: 112–25. doi:10.1016/j.ympev.2008.03.015
- 772 32. Grismer JL, Bauer AM, Grismer LL, Thirakhupt K, Aowphol A, Oaks JR, et al. Multiple  
773 origins of parthenogenesis, and a revised species phylogeny for the Southeast Asian  
774 butterfly lizards, *Leiolepis*. *Biol J Linn Soc.* 2014;113: 1080–1093. doi:10.1111/bij.12367
- 775 33. Folt B, Garrison N, Guyer C, Rodriguez J, Bond JE. Phylogeography and evolution of the  
776 Red Salamander (*Pseudotriton ruber*). *Mol Phylogenet Evol.* Elsevier Inc.; 2016;98: 97–  
777 110. doi:10.1016/j.ympev.2016.01.016
- 778 34. Kimura M. A simple method for estimating evolutionary rate of base substitutions through  
779 comparative studies of nucleotide sequences. *J Mol Evol.* 1980;16: 111–120.
- 780 35. Schliep K. phangorn: phylogenetic analysis in R. *Bioinformatics* 27: 592–593.
- 781 36. R Core Team. R: A language and environment for statistical computing. In: R Foundation

- 782 for Statistical Computing, Vienna, Austria [Internet]. 2016. Available: [https://www.r-](https://www.r-project.org/)  
783 [project.org/](https://www.r-project.org/)
- 784 37. Bauder JM, Barnhart P. Factors affecting the accuracy and precision of triangulated radio  
785 telemetry locations of Eastern Indigo Snakes. *Herpetol Rev.* 2014;45: 590–597.
- 786 38. Bauder J, Breininger DR, Bolt M, Legare M, Jenkins C, Rothermel B, et al. Seasonal  
787 variation in eastern indigo snake (*Drymarchon couperi*) movement patterns and space use  
788 in peninsular Florida at multiple temporal scales. *Herpetologica.* 2016;72: 214–226.
- 789 39. Shamblin BM, Alstad TI, Stevenson DJ, Macey JN, Snow FH, Nairn CJ. Isolation and  
790 characterization of microsatellite markers from the threatened eastern indigo snake  
791 (*Drymarchon couperi*). *Conserv Genet Resour.* 2011;3: 303–306. doi:10.1007/s12686-  
792 010-9348-5
- 793 40. Chapuis MP, Estoup A. Microsatellite null alleles and estimation of population  
794 differentiation. *Mol Biol Evol.* 2007;24: 621–631. doi:10.1093/molbev/msl191
- 795 41. Pritchard JK, Stephens M, Donnelly P. Inference of population structure using multilocus  
796 genotype data. *Genetics.* 2000;155: 945–959. doi:10.1111/j.1471-8286.2007.01758.x
- 797 42. Earl D, VonHoldt B. STRUCTURE HARVESTER: a website and program for visualizing  
798 STRUCTURE output and implementing the Evanno method. *Conserv Genet Resour.*  
799 2012;4.
- 800 43. Evanno G, Regnaut S, Goudet J. Detecting the number of clusters of individuals using the  
801 software STRUCTURE: A simulation study. *Mol Ecol.* 2005;14: 2611–2620.  
802 doi:10.1111/j.1365-294X.2005.02553.x
- 803 44. Jakobsson M, Rosenberg N. CLUMPP: a cluster matching and permutation program for  
804 dealing with label switching and multimodality in analysis of population structure.  
805 *Bioinformatics.* 2007;23: 1801–1806.
- 806 45. Janes JK, Miller JM, Dupuis JR, Malenfant RM, Gorrell JC, Cullingham CI, et al. The K  
807 = 2 conundrum. *Mol Ecol.* 2017;26: 3594–3602. doi:10.1111/mec.14187
- 808 46. Kopelman N, Mayzel J, Jakobsson M, Rosenberg N, Mayrose I. CLUMPAK: a program  
809 for identifying clustering modes and packaging population structure inferences across K.  
810 *Mol Ecol Resour.* 2015;15: 1179–1191.
- 811 47. Jost L. GST and its relatives do not measure differentiation. *Mol Ecol.* 2008;17: 4015–  
812 4026. doi:10.1111/j.1365-294X.2008.03887.x
- 813 48. Winter D. MMOD: an R library for the calculation of population differentiation statistics.  
814 *Mol Ecol Resour.* 2012;12.
- 815 49. Jombart T, Devillard S, Dufour AB, Pontier D. Revealing cryptic spatial patterns in  
816 genetic variability by a new multivariate method. *Heredity (Edinb).* 2008;101: 92–103.  
817 doi:10.1038/hdy.2008.34
- 818 50. Stevenson DJ, Hyslop NL. Long-distance interpopulation movement: *Drymarchon*  
819 *couperi* (Eastern Indigo Snake). *Herpetol Rev.* 2010;41: 91–92.

- 820 51. Jombart T. adegenet: a R package for the multivariate analysis of genetic markers.  
821 Bioinformatics. 2008;24: 1403–1405.
- 822 52. van Strien MJ, Keller D, Holderegger R. A new analytical approach to landscape genetic  
823 modelling: Least-cost transect analysis and linear mixed models. Mol Ecol. 2012;21:  
824 4010–4023. doi:10.1111/j.1365-294X.2012.05687.x
- 825 53. Bowcock J, Ruiz-Linares A, Tomfohrde J, Minch E, Kidd J, Cavalli-Sforza L. High  
826 resolution of human evolutionary trees with polymorphic microsatellites. Nature.  
827 1994;368: 455–457.
- 828 54. Nakagawa S, Schielzeth H. A general and simple method for obtaining  $R^2$  from  
829 generalized linear mixed-effects models. Methods Ecol Evol. 2013;4: 133–142.
- 830 55. Johnson P. Extension of Nakagawa & Schielzeth's  $R^2_{GLMM}$  to random slopes models.  
831 Methods Ecol Evol. 2014;5: 944–946.
- 832 56. Peterman W. ResistanceGA: An R package for the optimization of resistance surfaces  
833 using genetic algorithms. Methods Ecol Evol. 2018;9: 1638–1647.
- 834 57. Ruane S, Bryson RW, Pyron RA, Burbrink FT. Coalescent species delimitation in  
835 Milksnakes (Genus *Lampropeltis*) and impacts on phylogenetic comparative analyses.  
836 Syst Biol. 2014;63: 231–250. doi:10.1093/sysbio/syt099
- 837 58. Meirmans PG. The trouble with isolation by distance. Mol Ecol. 2012;21: 2839–2846.  
838 doi:10.1111/j.1365-294X.2012.05578.x
- 839 59. Noss RF, Platt WJ, Sorrie BA, Weakley AS, Means DB, Costanza J, et al. How global  
840 biodiversity hotspots may go unrecognized: Lessons from the North American Coastal  
841 Plain. Divers Distrib. 2015;21: 236–244. doi:10.1111/ddi.12278
- 842 60. Burbrink FT, Guiher TJ. Considering gene flow when using coalescent methods to delimit  
843 lineages of North American pitvipers of the genus *Agkistrodon*. Zool J Linn Soc.  
844 2014;173: 505–526.
- 845 61. Pyron RA, Hsieh FW, Lemmon AR, Lemmon EM, Hendry CR. Integrating phylogenomic  
846 and morphological data to assess candidate species-delimitation models in brown and red-  
847 bellied snakes (*Storeria*). Zool J Linn Soc. 2016;177: 937–949. doi:10.1111/zoj.12392
- 848 62. Mckelvy AD, Burbrink FT. Ecological divergence in the yellow-bellied kingsnake  
849 (*Lampropeltis calligaster*) at two North American biodiversity hotspots. Mol Phylogenet  
850 Evol. 2017;106: 61–72.
- 851 63. Soltis DE, Morris AB, McLachlan JS, Manos PS, Soltis PS. Comparative phylogeography  
852 of unglaciated eastern North America. Mol Ecol. 2006;15: 4261–93. doi:10.1111/j.1365-  
853 294X.2006.03061.x
- 854 64. Noss R. Forgotten grasslands of the South: natural history and conservation. Washington,  
855 DC: Island Press; 2013.
- 856 65. Strickland JL, Parkinson CL, McCoy JK, Ammerman LK. Phylogeography of  
857 *Agkistrodon piscivorus* with Emphasis on the Western Limit of Its Range. Copeia.

- 858 2014;2014: 639–649. doi:10.1643/CG-13-123
- 859 66. Thomas TM, Granatosky MC, Bourque JR, Krysko KL, Moler PE, Gamble T, et al.  
860 Taxonomic assessment of Alligator Snapping Turtles (Chelydridae: *Macrochelys*), with  
861 the description of two new species from the southeastern United States. *Zootaxa*.  
862 2014;3786: 141–165.
- 863 67. Echelle AA, Hackler JC, Lack JB, Ballard SR, Roman J, Fox SF, et al. Conservation  
864 genetics of the alligator snapping turtle: cytonuclear evidence of range-wide bottleneck  
865 effects and unusually pronounced geographic structure. *Conserv Genet*. 2010;11: 1375–  
866 1387. doi:10.1007/s10592-009-9966-1
- 867 68. Folt B, Guyer C. Evaluating recent taxonomic changes for alligator snapping turtles  
868 (Testudines: Chelydridae). *Zootaxa*. 2015;3947: 447–450.
- 869 69. Gordon MR, Simandle ET, Tracy CR. A diamond in the rough desert shrublands of the  
870 Great Basin in the Western United States: A new cryptic toad species (Amphibia:  
871 Bufonidae: *Bufo* (*Anaxyrus*)) discovered in Northern Nevada. *Zootaxa*. 2017;4290: 123–  
872 139. doi:10.11646/zootaxa.4290.1.7
- 873 70. Forrest M, Stiller J, King T, Rouse G. Between hot rocks and dry places: the status of the  
874 Dixie Valley Toad. *West North Am Nat*. 2017;77: 162–175.
- 875 71. Madsen T, Shine R. Do snakes shrink? *Oikos*. 2001;92: 187–188. doi:10.1034/j.1600-  
876 0706.2001.920122.x
- 877 72. Hyslop NL, Meyers J, Cooper R, Stevenson D. Effects of body size and sex of  
878 *Drymarchon couperi* (Eastern Indigo Snake) on habitat use, movements, and home range  
879 size in Georgia. *J Wildl Manage*. 2014;78: 101–111.
- 880 73. Breininger DR, Bolt MR, Legare ML, Drese JH, Stolen ED. Factors Influencing Home-  
881 Range Sizes of Eastern Indigo Snakes in Central Florida. *J Herpetol*. 2011;45: 484–490.
- 882 74. Bauder JM, Breininger DR, Bolt MR, Legare ML, Jenkins CL, Rothermel BB, et al. The  
883 influence of sex and season on conspecific spatial overlap in a large, actively-foraging  
884 colubrid snake. *PLoS One*. 2016;11: 1–19. doi:10.1371/journal.pone.0160033
- 885 75. Stiles JA. Evaluating the use of enclosures to reintroduce Eastern Indigo snakes. Auburn  
886 University. 2013.
- 887 76. Bauder JM, Breininger DR, Bolt MR, Legare ML, Jenkins CL, Rothermel BB, et al.  
888 Multi-level, multi-scale habitat selection by a wide-ranging, federally threatened snake.  
889 *Landsc Ecol*. Springer Netherlands; 2018; doi:10.1007/s10980-018-0631-2
- 890 77. O’Bryan CJ. Documentation of unusual movement behaviour of the indigo snake  
891 *Drymarchon couperi* (Holbrook, 1842) (Squamata: Colubridae), an upland species, in a  
892 pastureland matrix of the USA. *Herpetol Notes*. 2017;10: 317–318.
- 893 78. Frankham R, Ballou JD, Eldridge MDB, Lacy RC, Ralls K, Dudash MR, et al. Predicting  
894 the Probability of Outbreeding Depression. *Conserv Biol*. 2011;25: 465–475.  
895 doi:10.1111/j.1523-1739.2011.01662.x

- 896 79. Thorpe RS, Surget-Groba Y, Johansson H. The relative importance of ecology and  
897 geographic isolation for speciation in anoles. *Philos Trans R Soc B Biol Sci.* 2008;363:  
898 3071–3081. doi:10.1098/rstb.2008.0077
- 899 80. Bowen BW, Bass AL, Soares L, Toonen RJ. Conservation implications of complex  
900 population structure: Lessons from the loggerhead turtle (*Caretta caretta*). *Mol Ecol.*  
901 2005;14: 2389–2402. doi:10.1111/j.1365-294X.2005.02598.x
- 902 81. de Fraga R, Lima AP, Magnusson WE, Ferrao M, Stow AJ. Contrasting patterns of gene  
903 flow for Amazonian snakes that actively forage and those that wait in ambush. *J Hered.*  
904 2017; 1–11. doi:10.1093/jhered/esx051
- 905 82. Leturque H, Rousset F. Intersexual competition as an explanation for sex-ratio and  
906 dispersal biases in polygynous species. *Evolution (NY).* 2004;58: 2398–2408.
- 907 83. Keogh J, Webb J, Shine R. Spatial genetic analysis and long-term mark-recapture data  
908 demonstrate male-biased dispersal in a snake. *Biol Lett.* 2007;3: 33–35.
- 909 84. Dubey S, Brown GP, Madsen T, Shine R. Male-biased dispersal in a tropical Australian  
910 snake (*Stegonotus cucullatus*, Colubridae). *Mol Ecol.* 2008;17: 3506–3514.  
911 doi:10.1111/j.1365-294X.2008.03859.x
- 912 85. Calsbeek R. Sex-specific adult dispersal and its selective consequences in the brown  
913 anole, *Anolis sagrei*. *J Anim Ecol.* 2009;78: 617–624. doi:10.1111/j.1365-  
914 2656.2009.01527.x
- 915 86. Krysko K, Smith D, Smith C. Historic and current geographic distribution and preliminary  
916 evidence of population genetic structure in the Eastern Indigo Snake (*Drymarchon*  
917 *couperi*) in the southeastern United States. Tallahassee, Florida; 2010.
- 918 87. Stevenson DJ, Dyer KJ, Willis-Stevenson B a. Survey and Monitoring of the Eastern  
919 Indigo Snake in Georgia. *Southeast Nat.* 2003;2: 393–408. doi:10.1656/1528-  
920 7092(2003)002[0393:SAMOTE]2.0.CO;2
- 921 88. Hyslop NL, Cooper R, Meyers J. Seasonal shifts in shelter and microhabitat use of the  
922 threatened Eastern Indigo Snake (*Drymarchon couperi*) in Georgia. *Copeia.* 2009;2009:  
923 458–464.
- 924 89. Perry G, Garland T. Lizard home ranges revisited: effects of sex, body size, diet, habitat,  
925 and phylogeny. *Ecology.* 2002;83: 1870–1885.
- 926 90. Warwick AR, Travis J, Lemmon EM. Geographic variation in the Pine Barrens Treefrog  
927 (*Hyla andersonii*): Concordance of genetic, morphometric, and acoustic signal data. *Mol*  
928 *Ecol.* 2015; n/a-n/a. doi:10.1111/mec.13242
- 929 91. Sovic M, Fries A, Gibbs H. Origin of a cryptic lineage in a threatened reptile through  
930 isolation and historical hybridization. *Heredity (Edinb).* 2016;117: 358–366.
- 931 92. Macartney JM, Gregory PT, Larsen KW. A tabular survey of data on movements and  
932 home ranges of snakes. *J Herpetol.* 1988;22: 61–73.
- 933



**A**

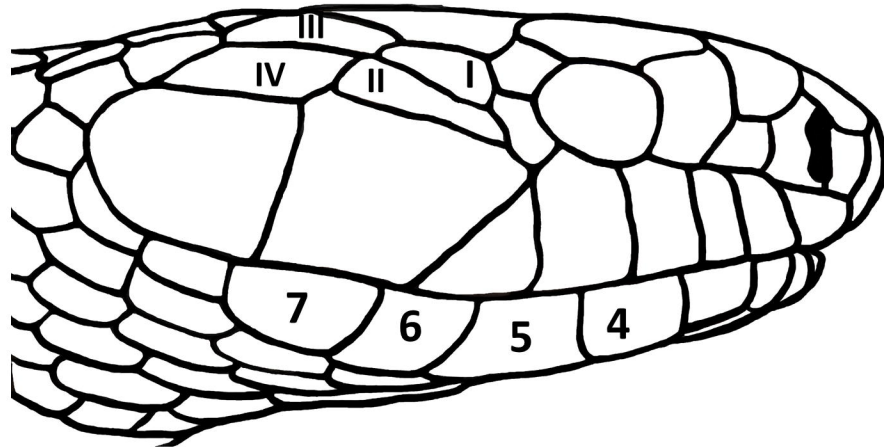

**B**

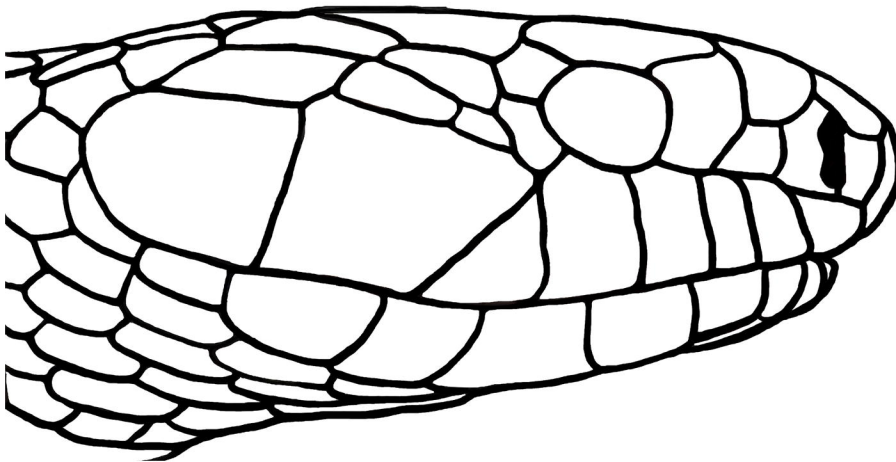

**C**

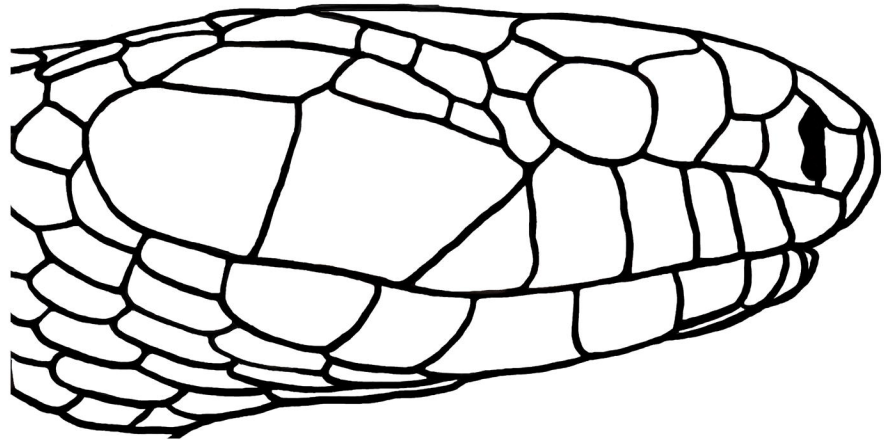

**D**

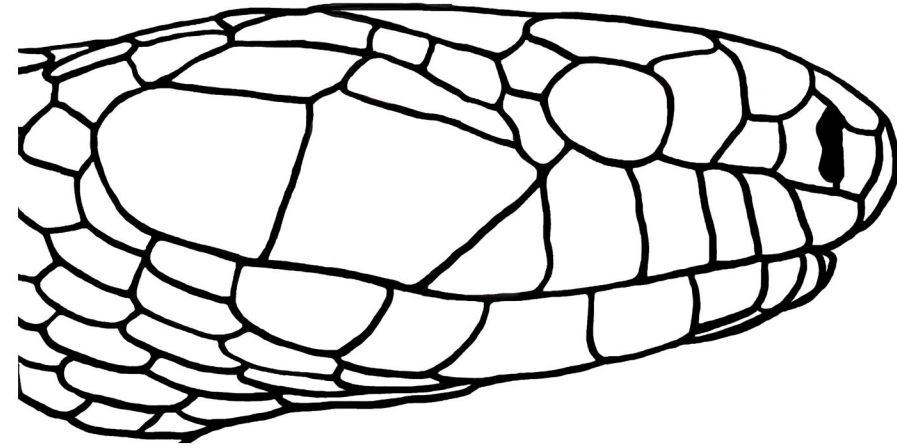

**Masticophis flagellum**

**Coluber constrictor**

**Drymarchon melanurus**

**Drymarchon melanurus**

**KT214324**

**KT214325**

**KT214326**

**KT214327**

**KT214328**

**KT214329**

**KT214330**

**KT214331**

**KT214332**

**KT214333**

**KT214334**

**KT214335**

**KT214336**

**KT214337**

**KT214338**

**KT214339**

**KT214340**

**KT214341**

**KT214342**

**KT214343**

**KT214344**

**KT447212**

**KT447213**

0.002

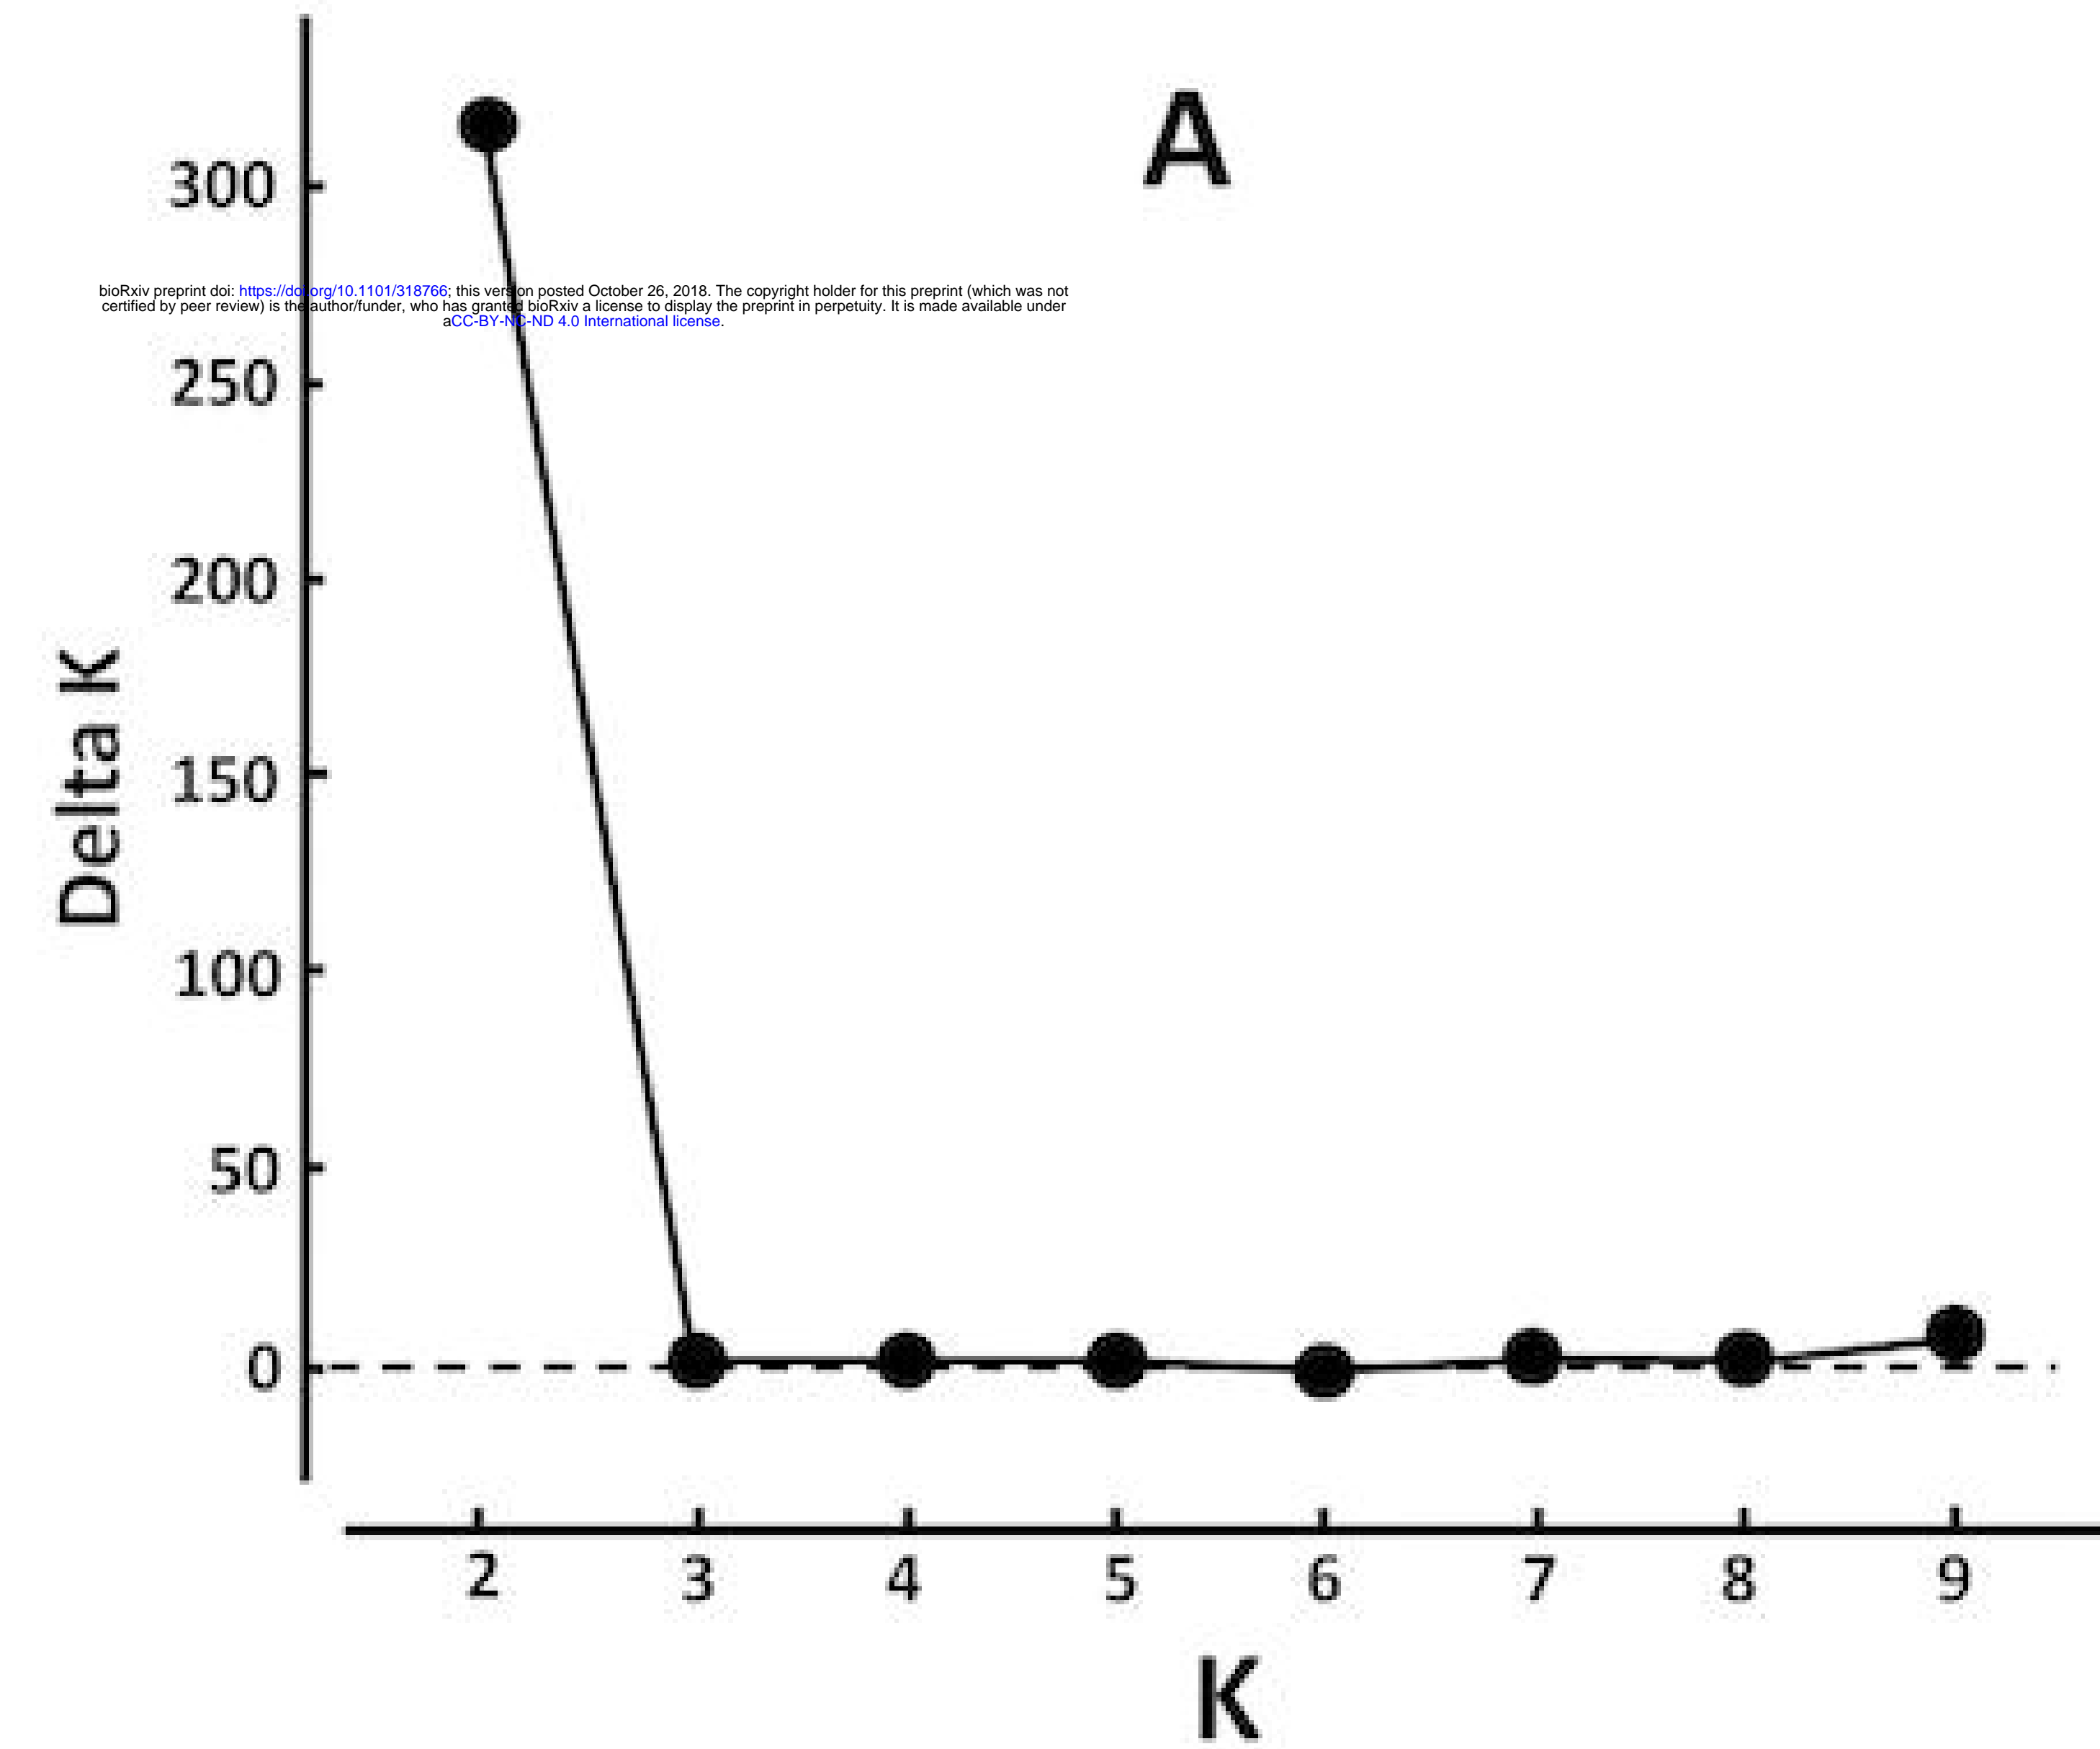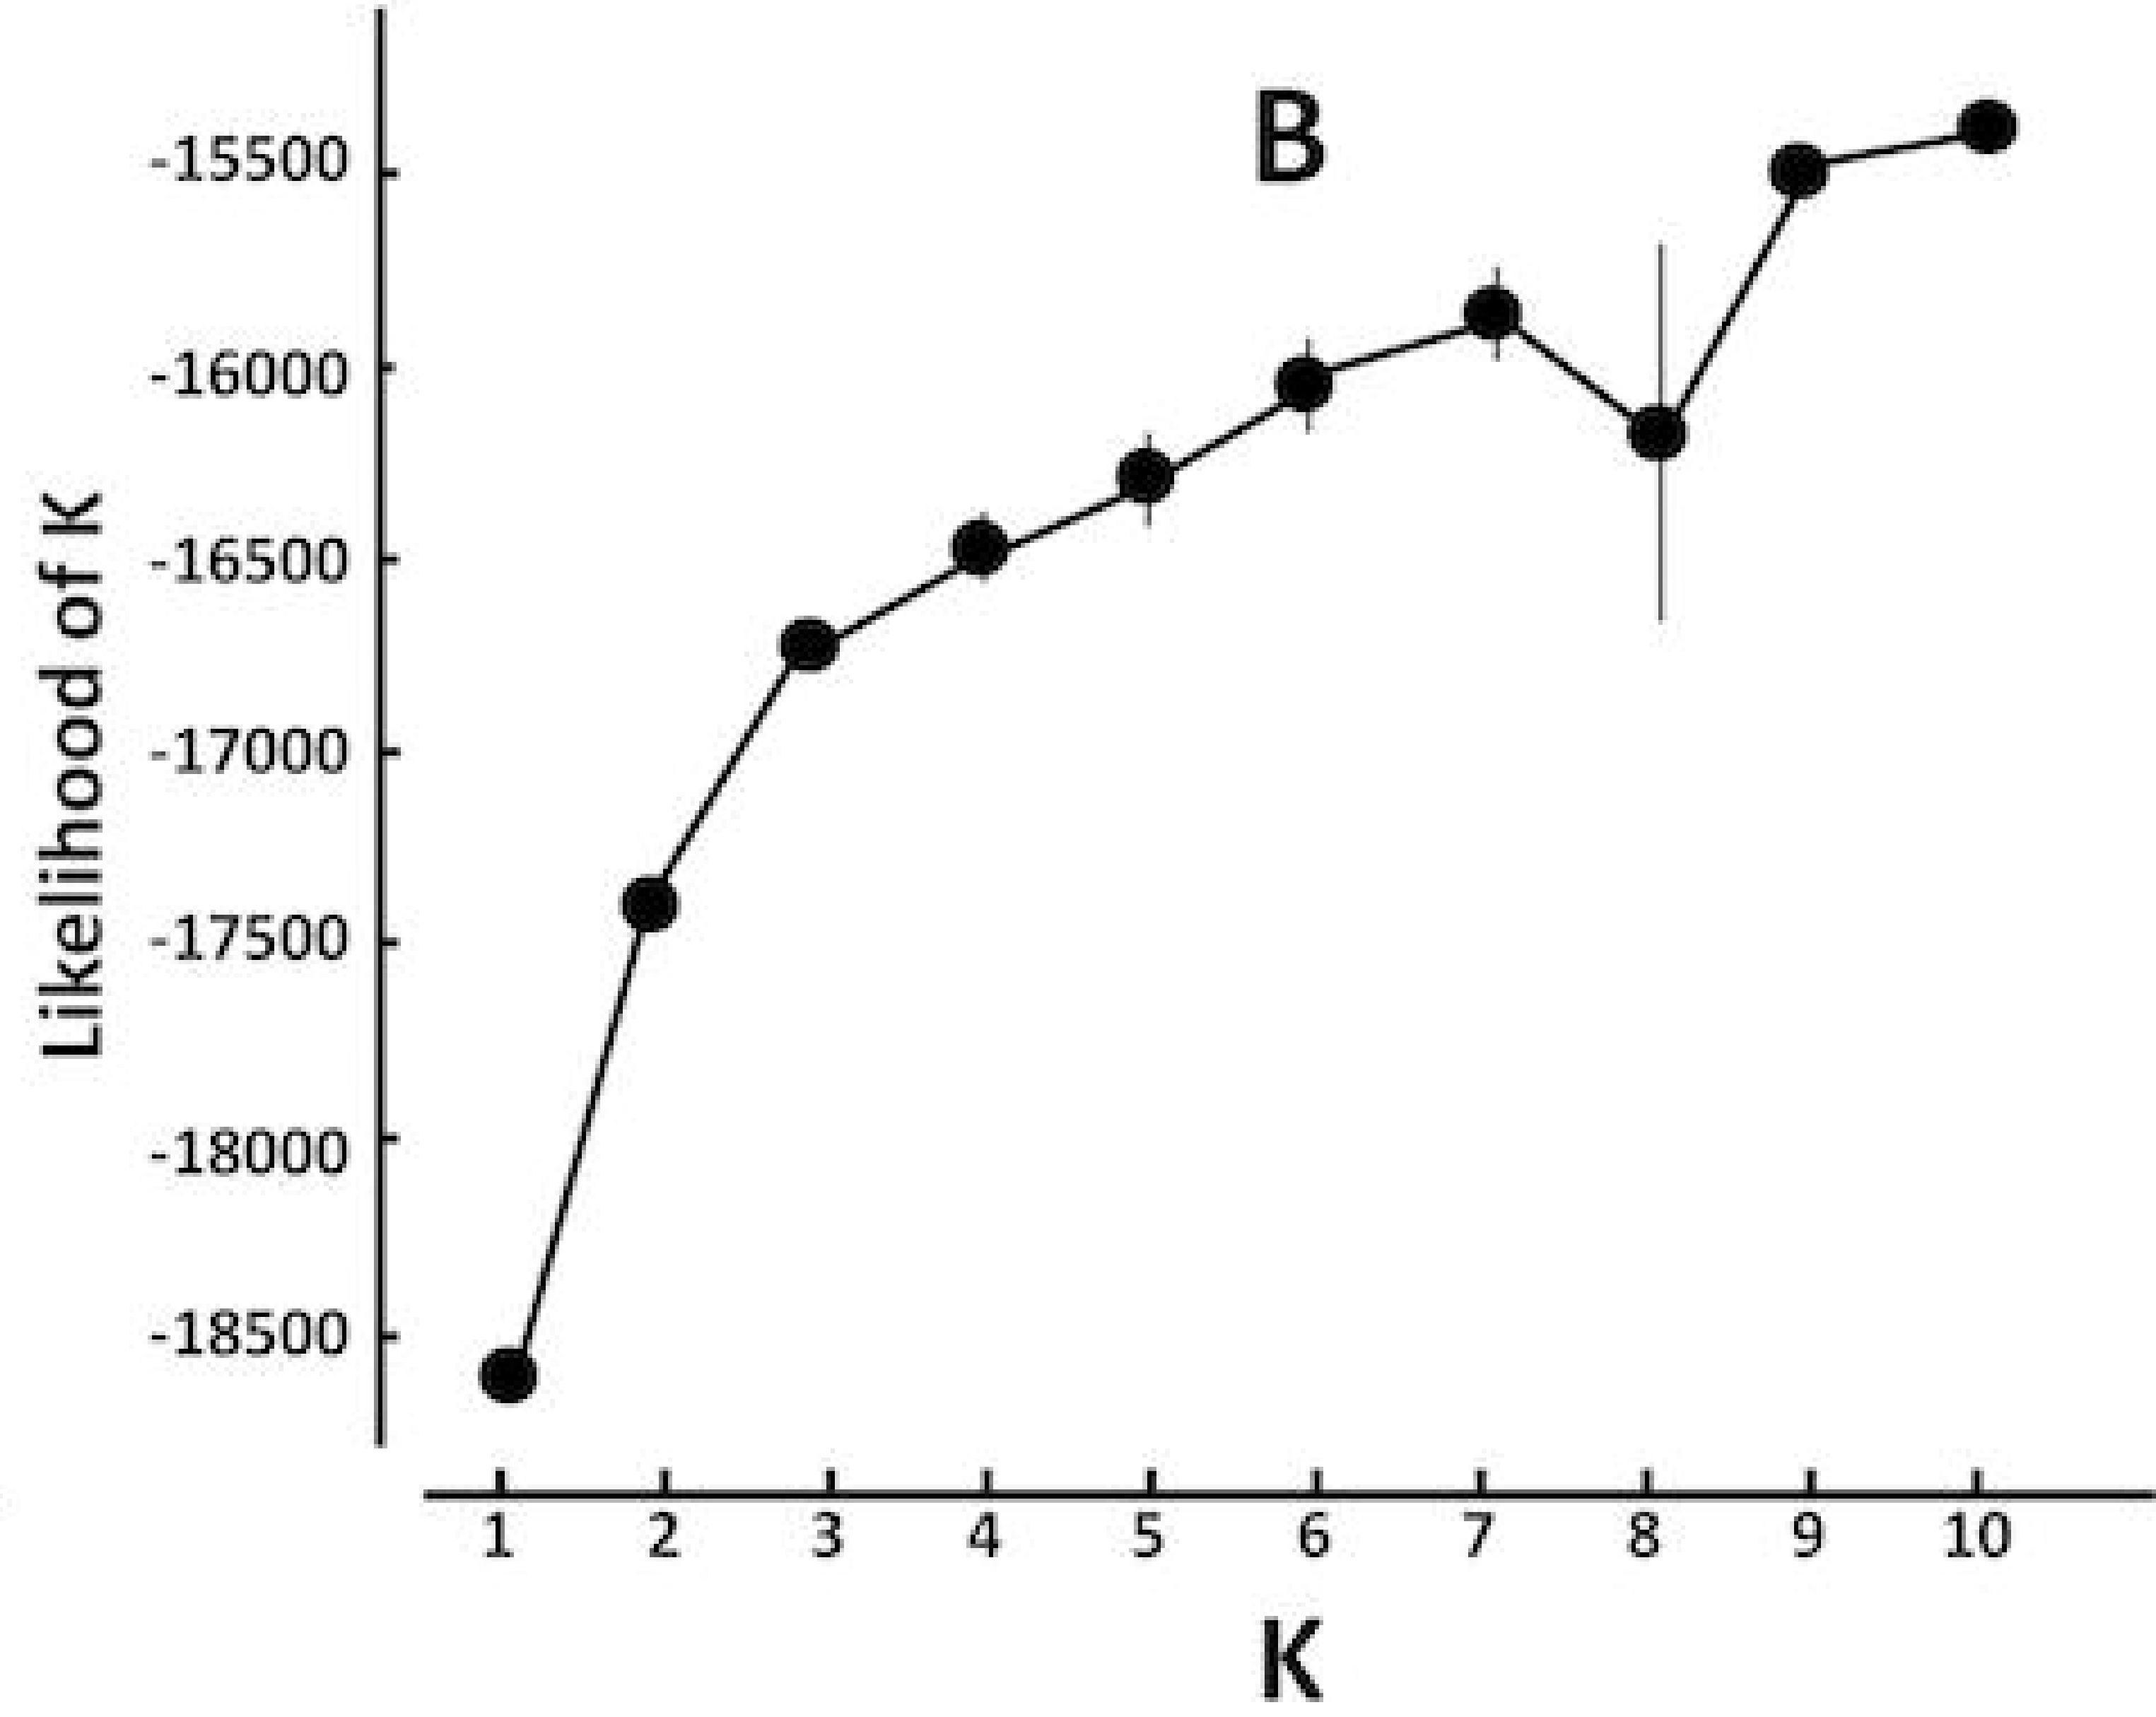



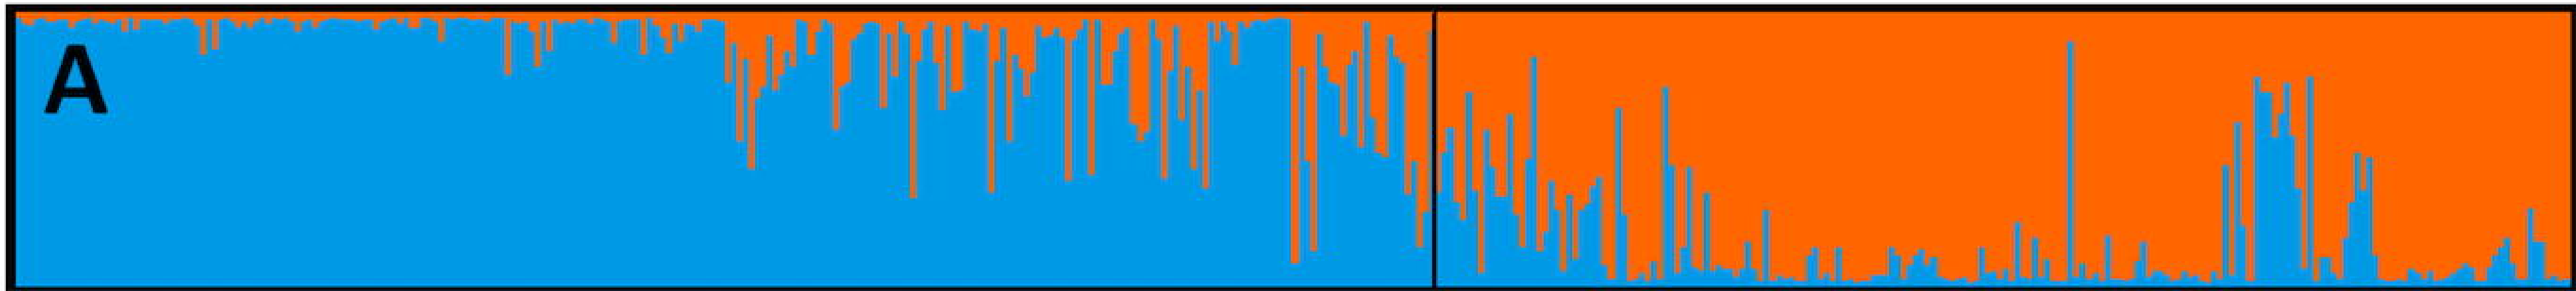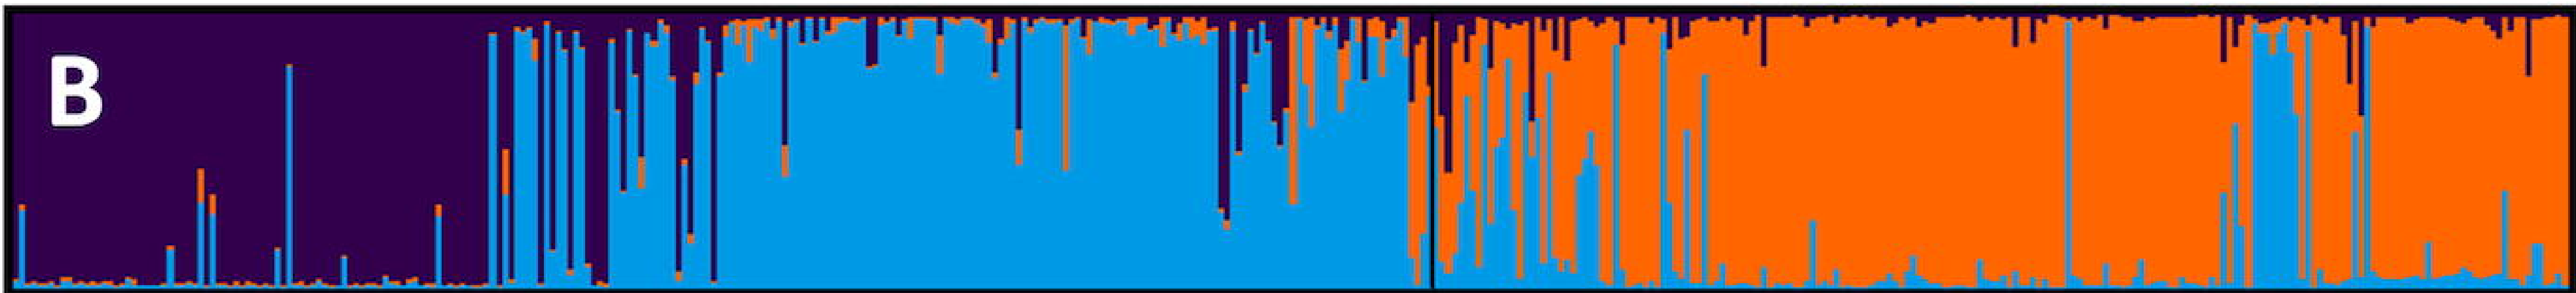

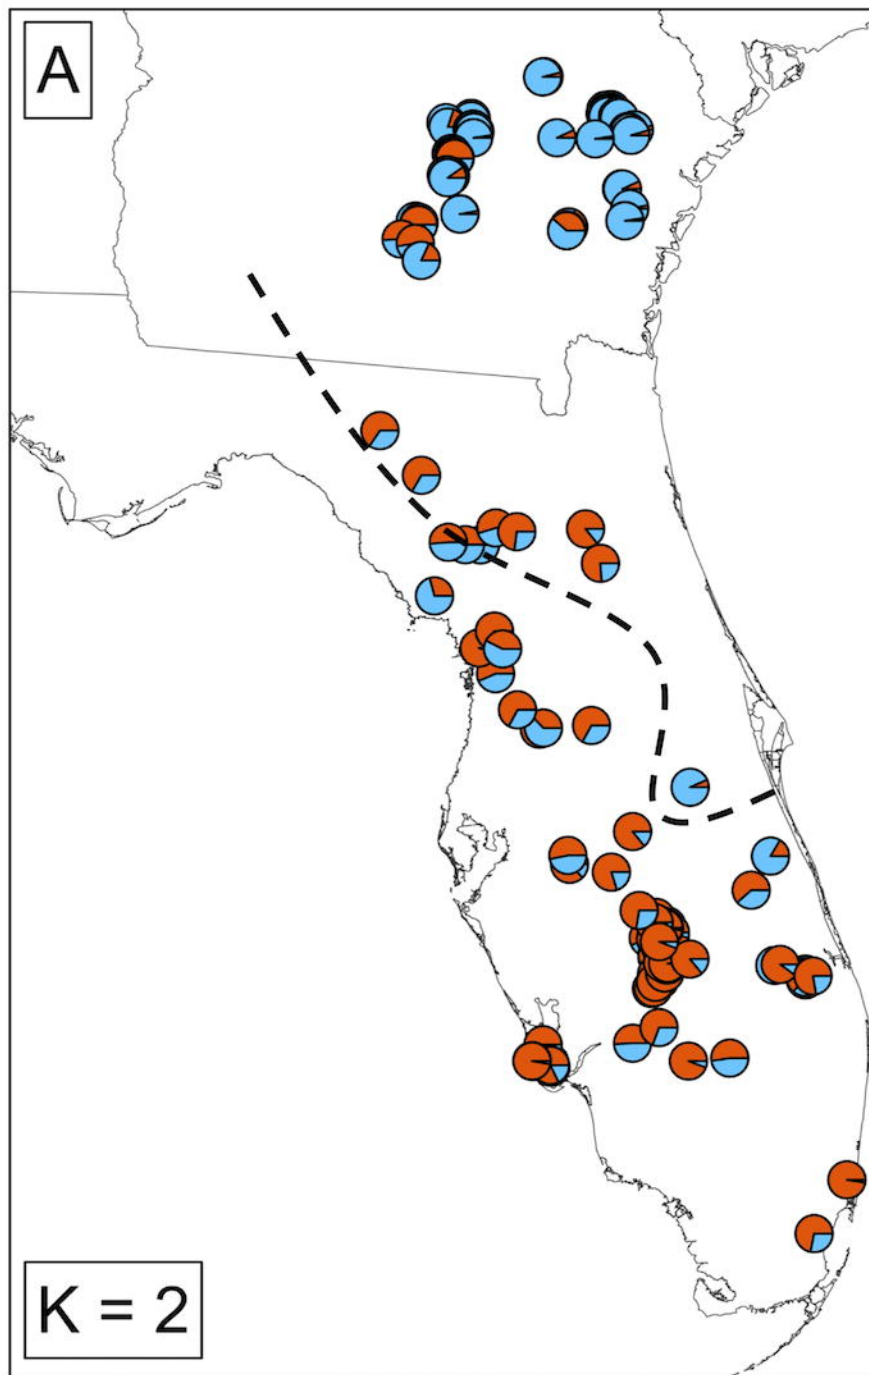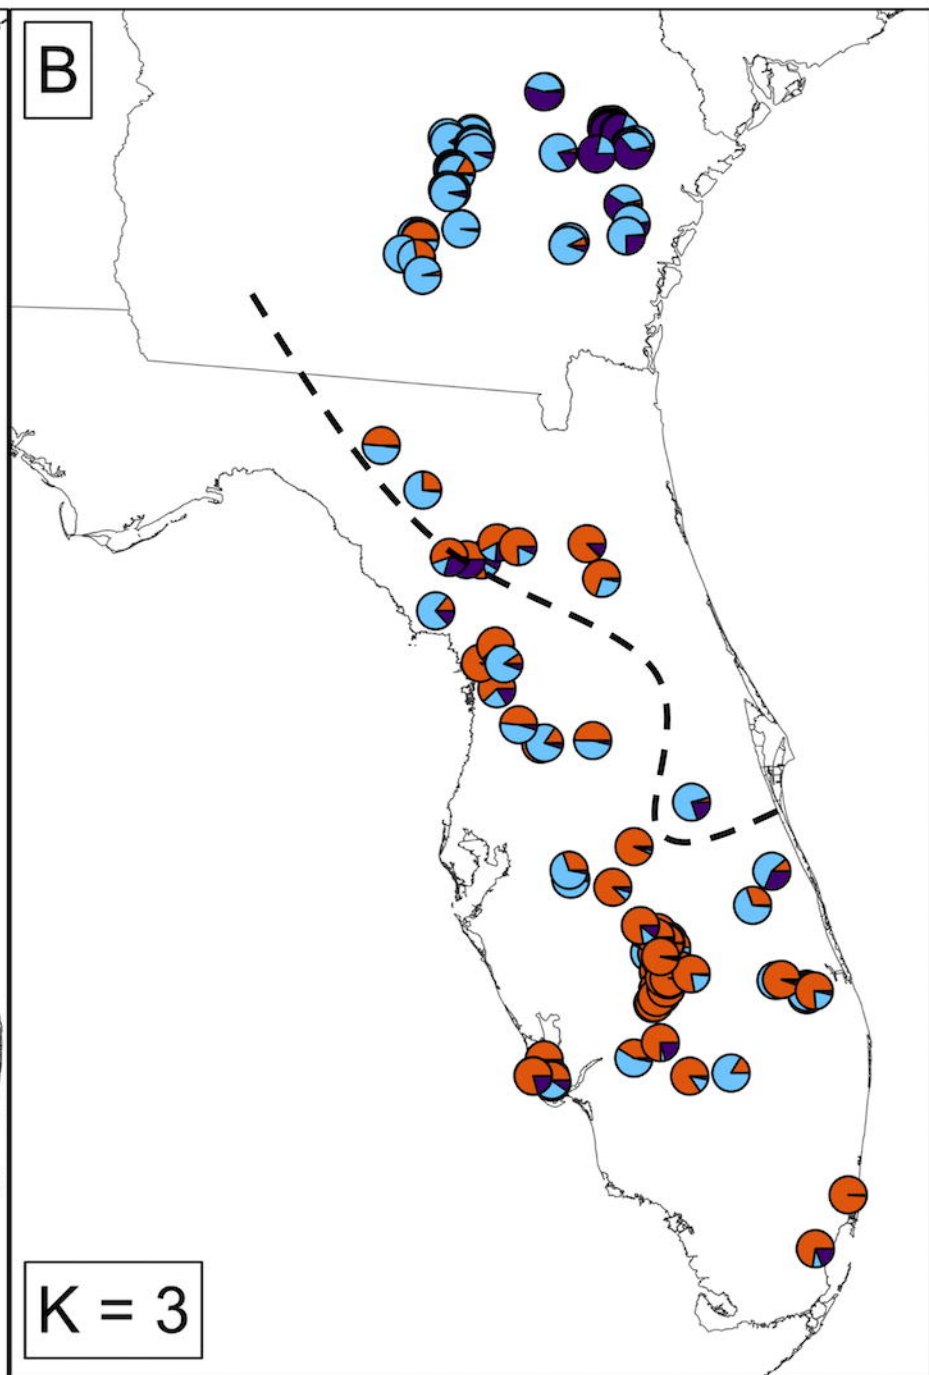

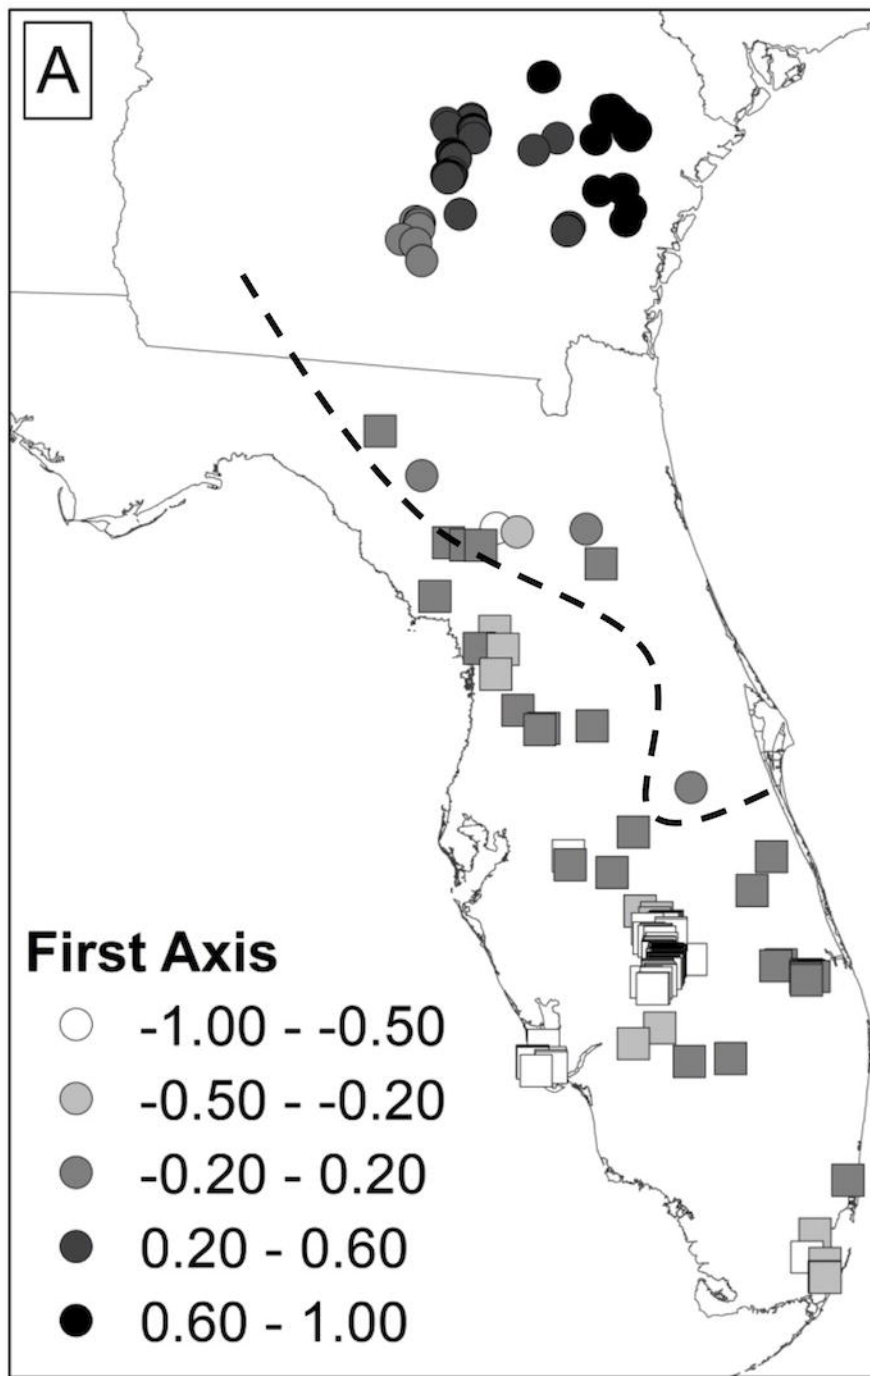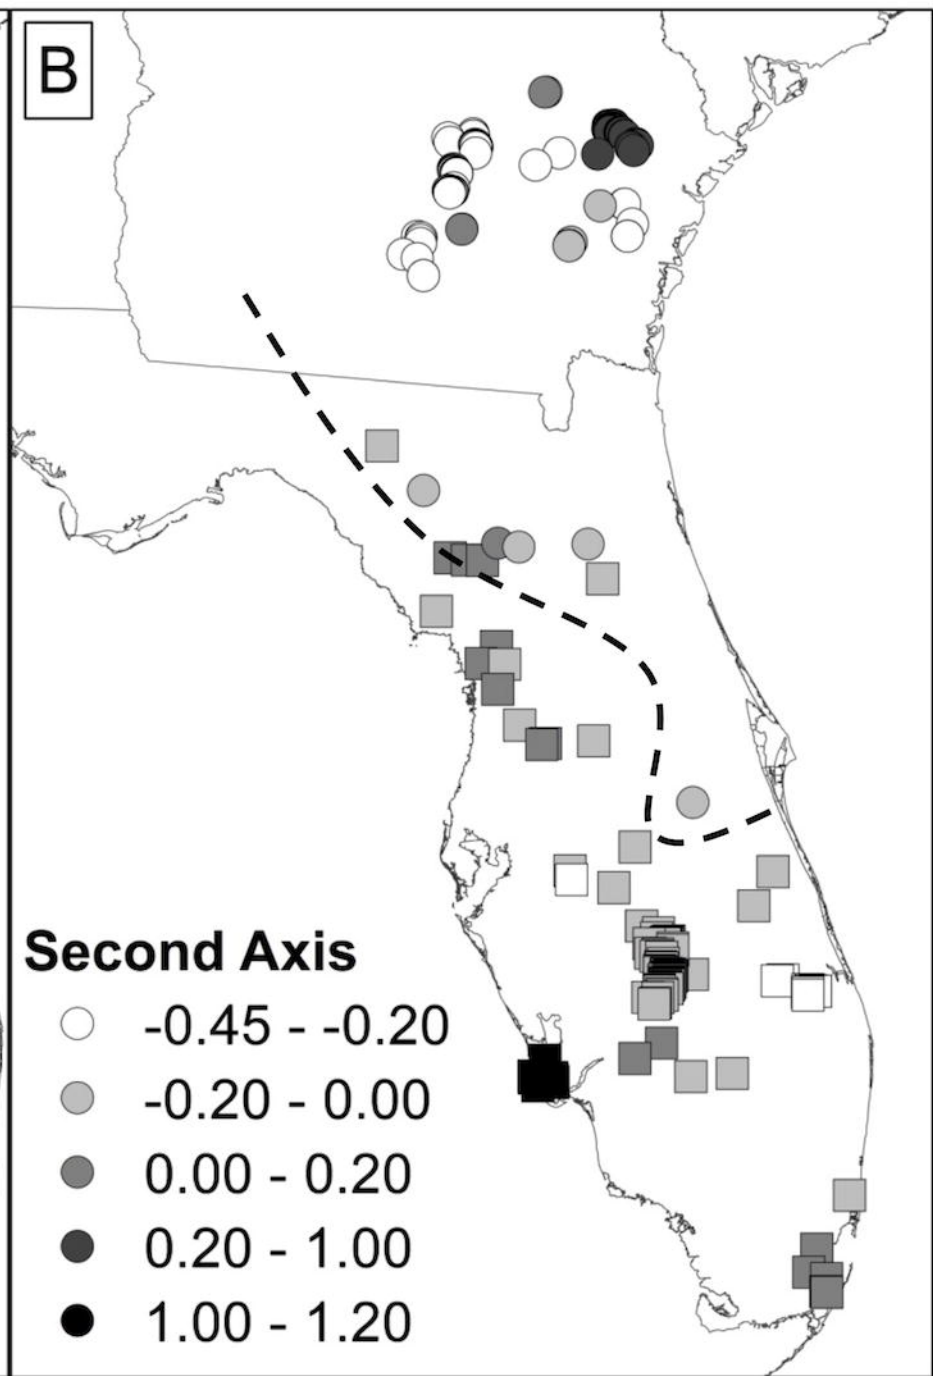

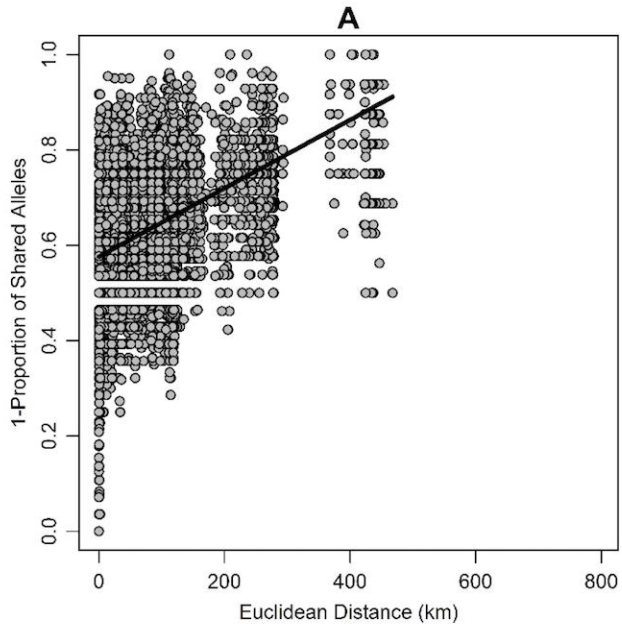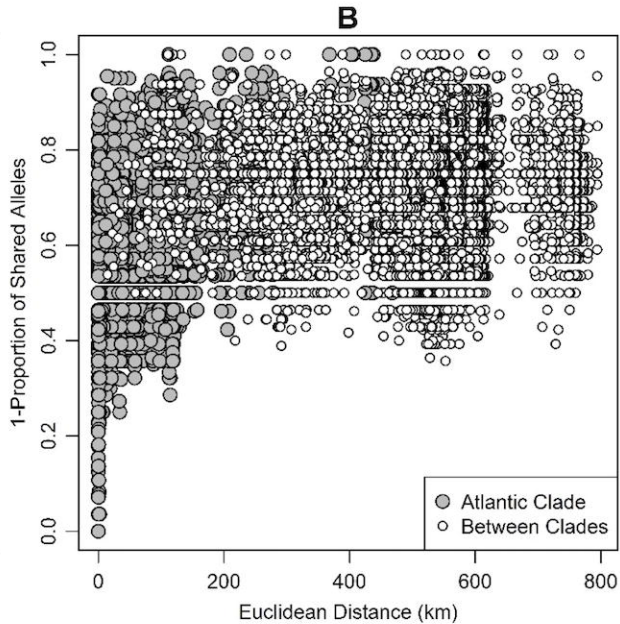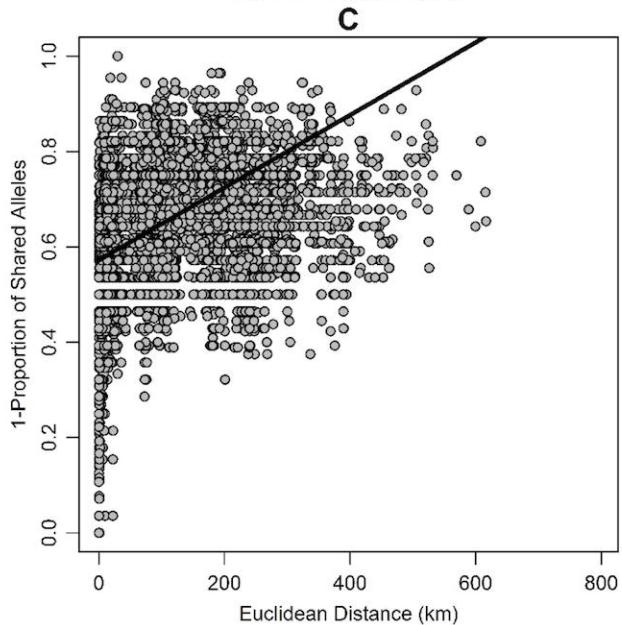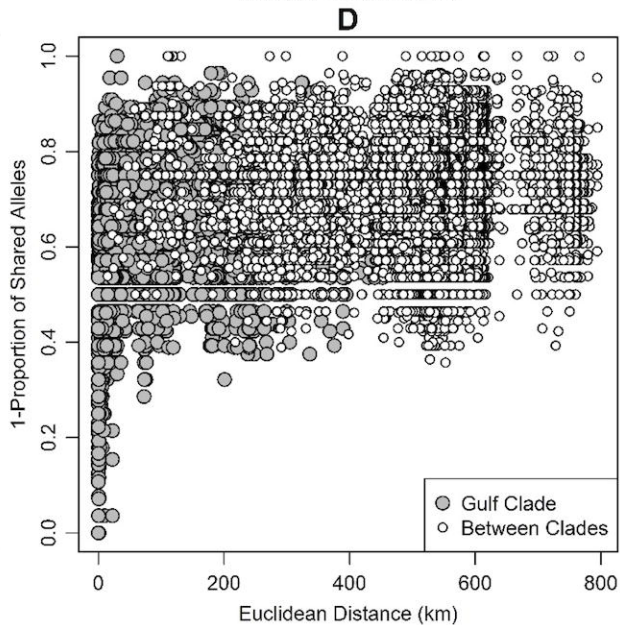

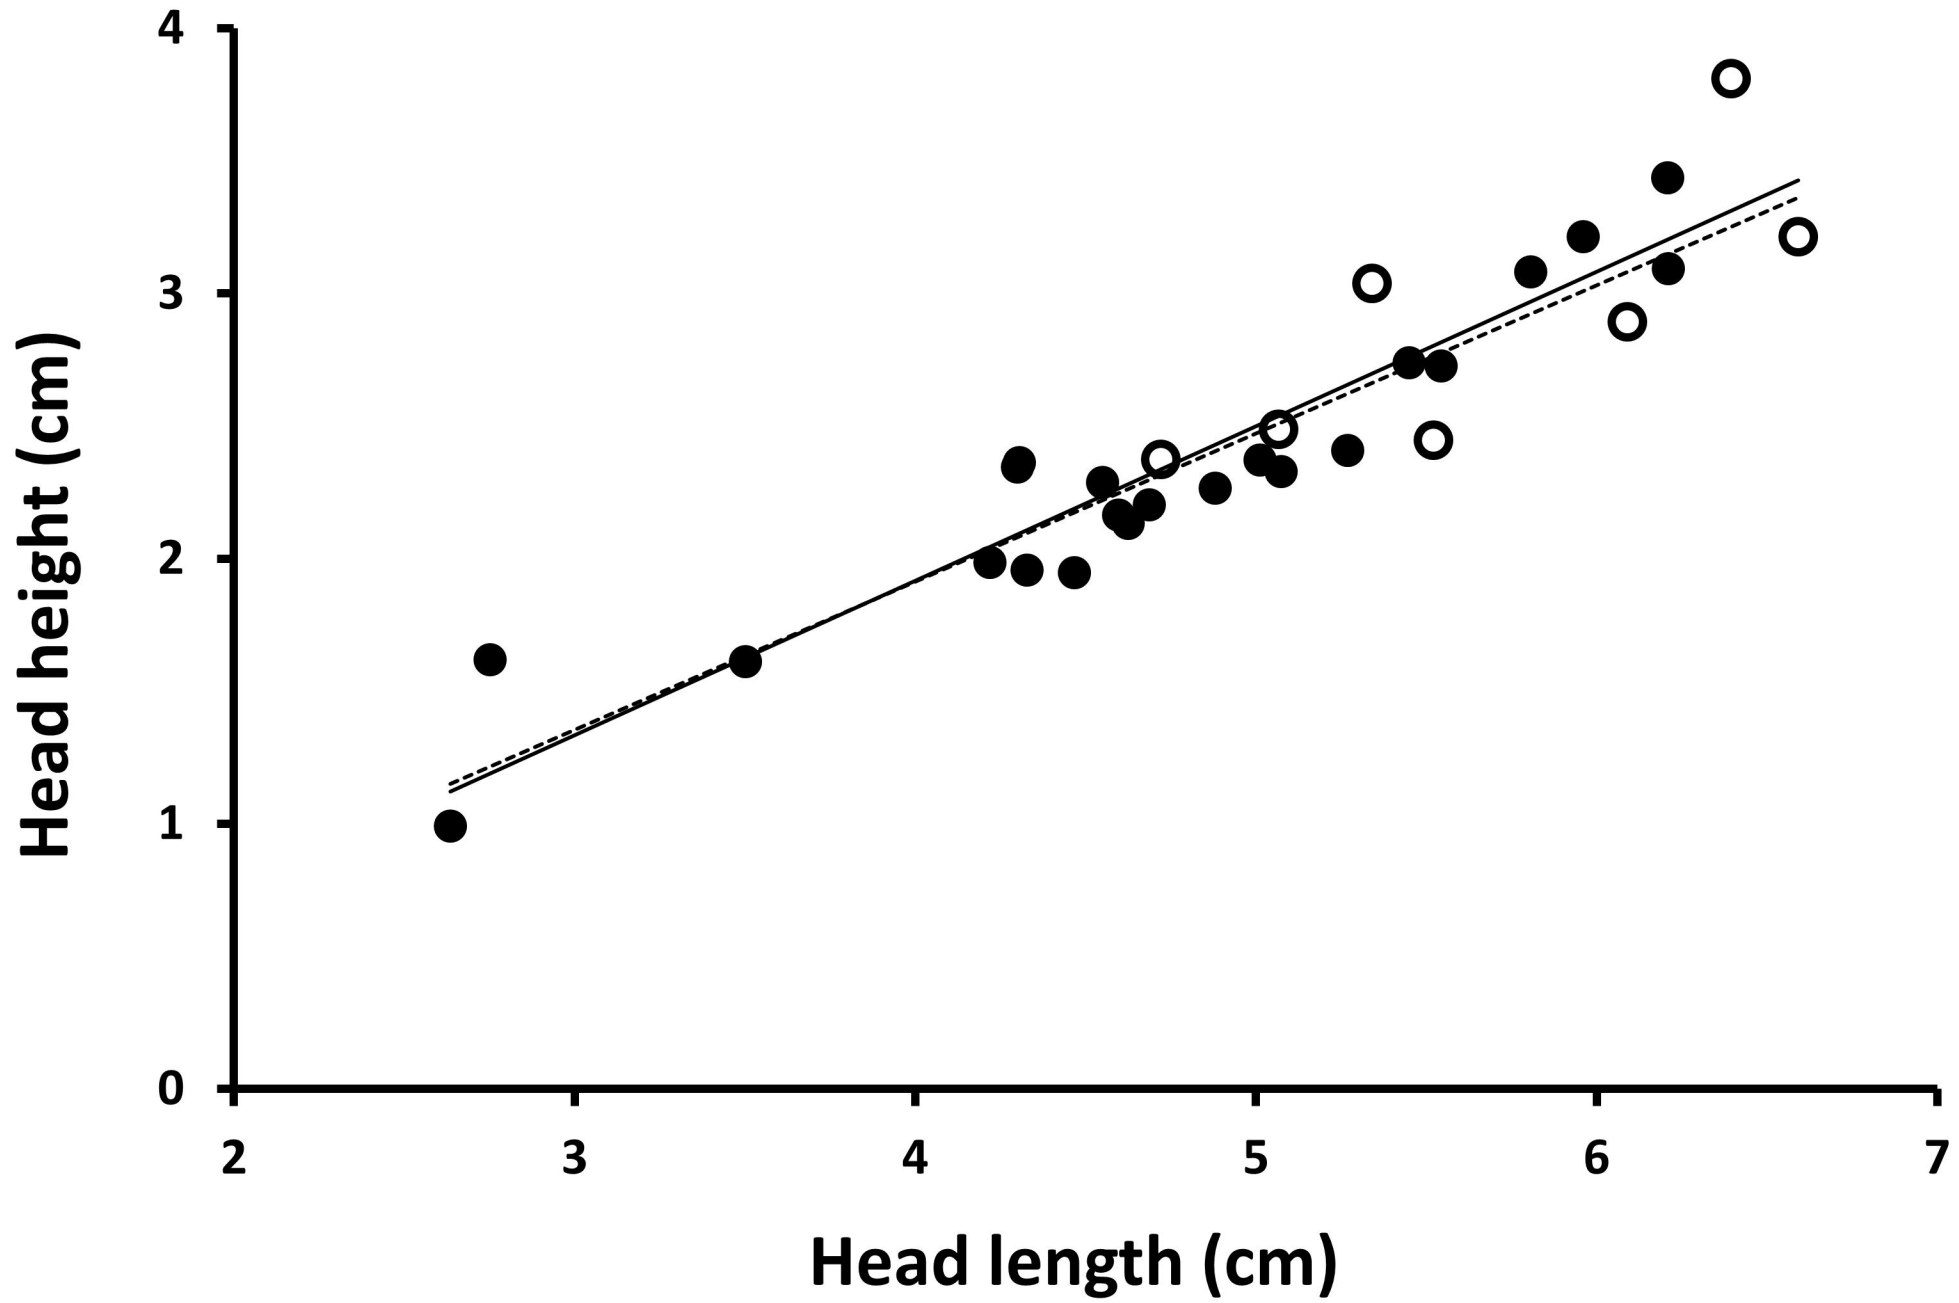

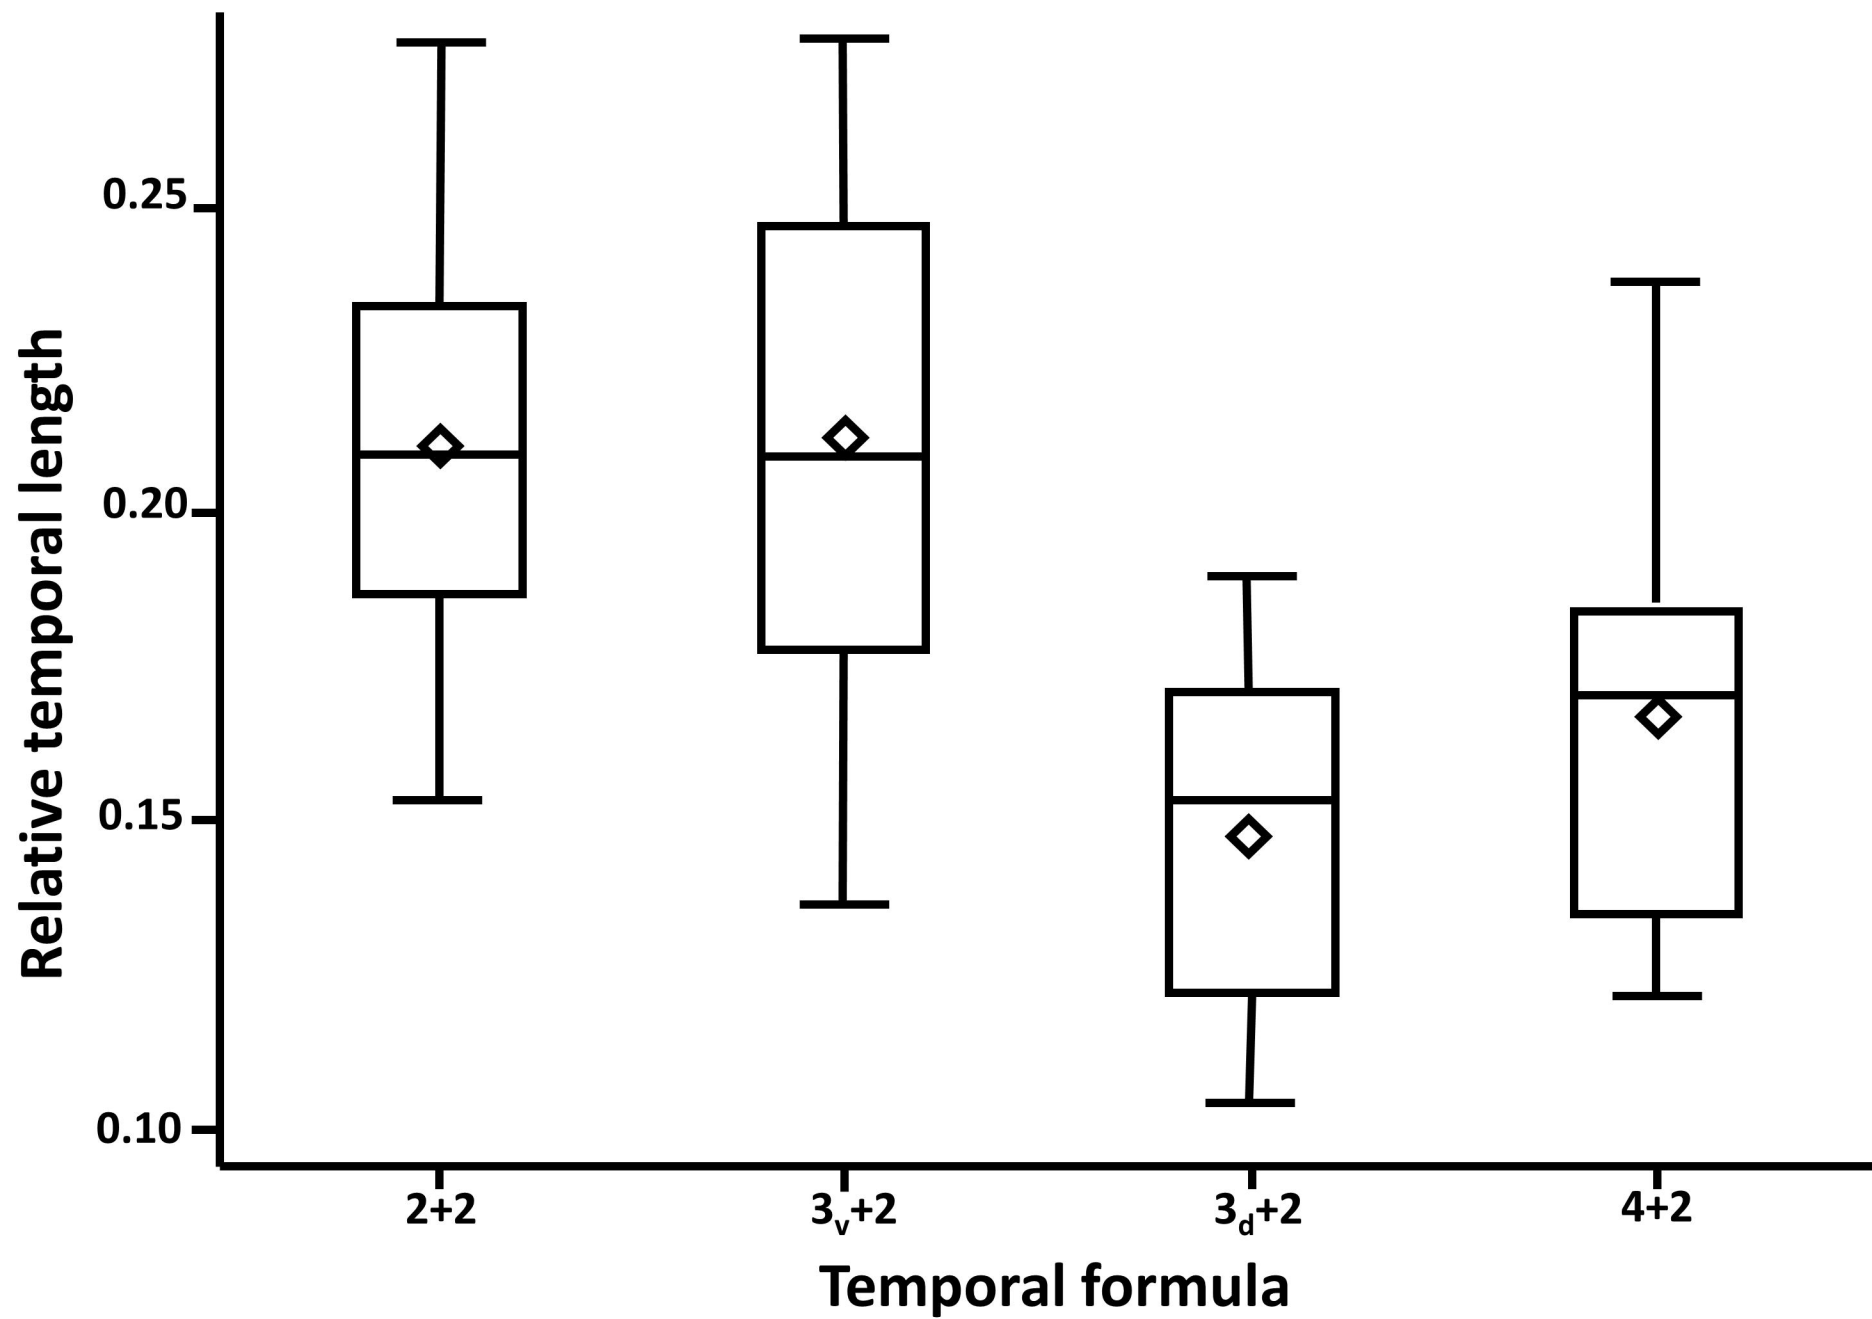

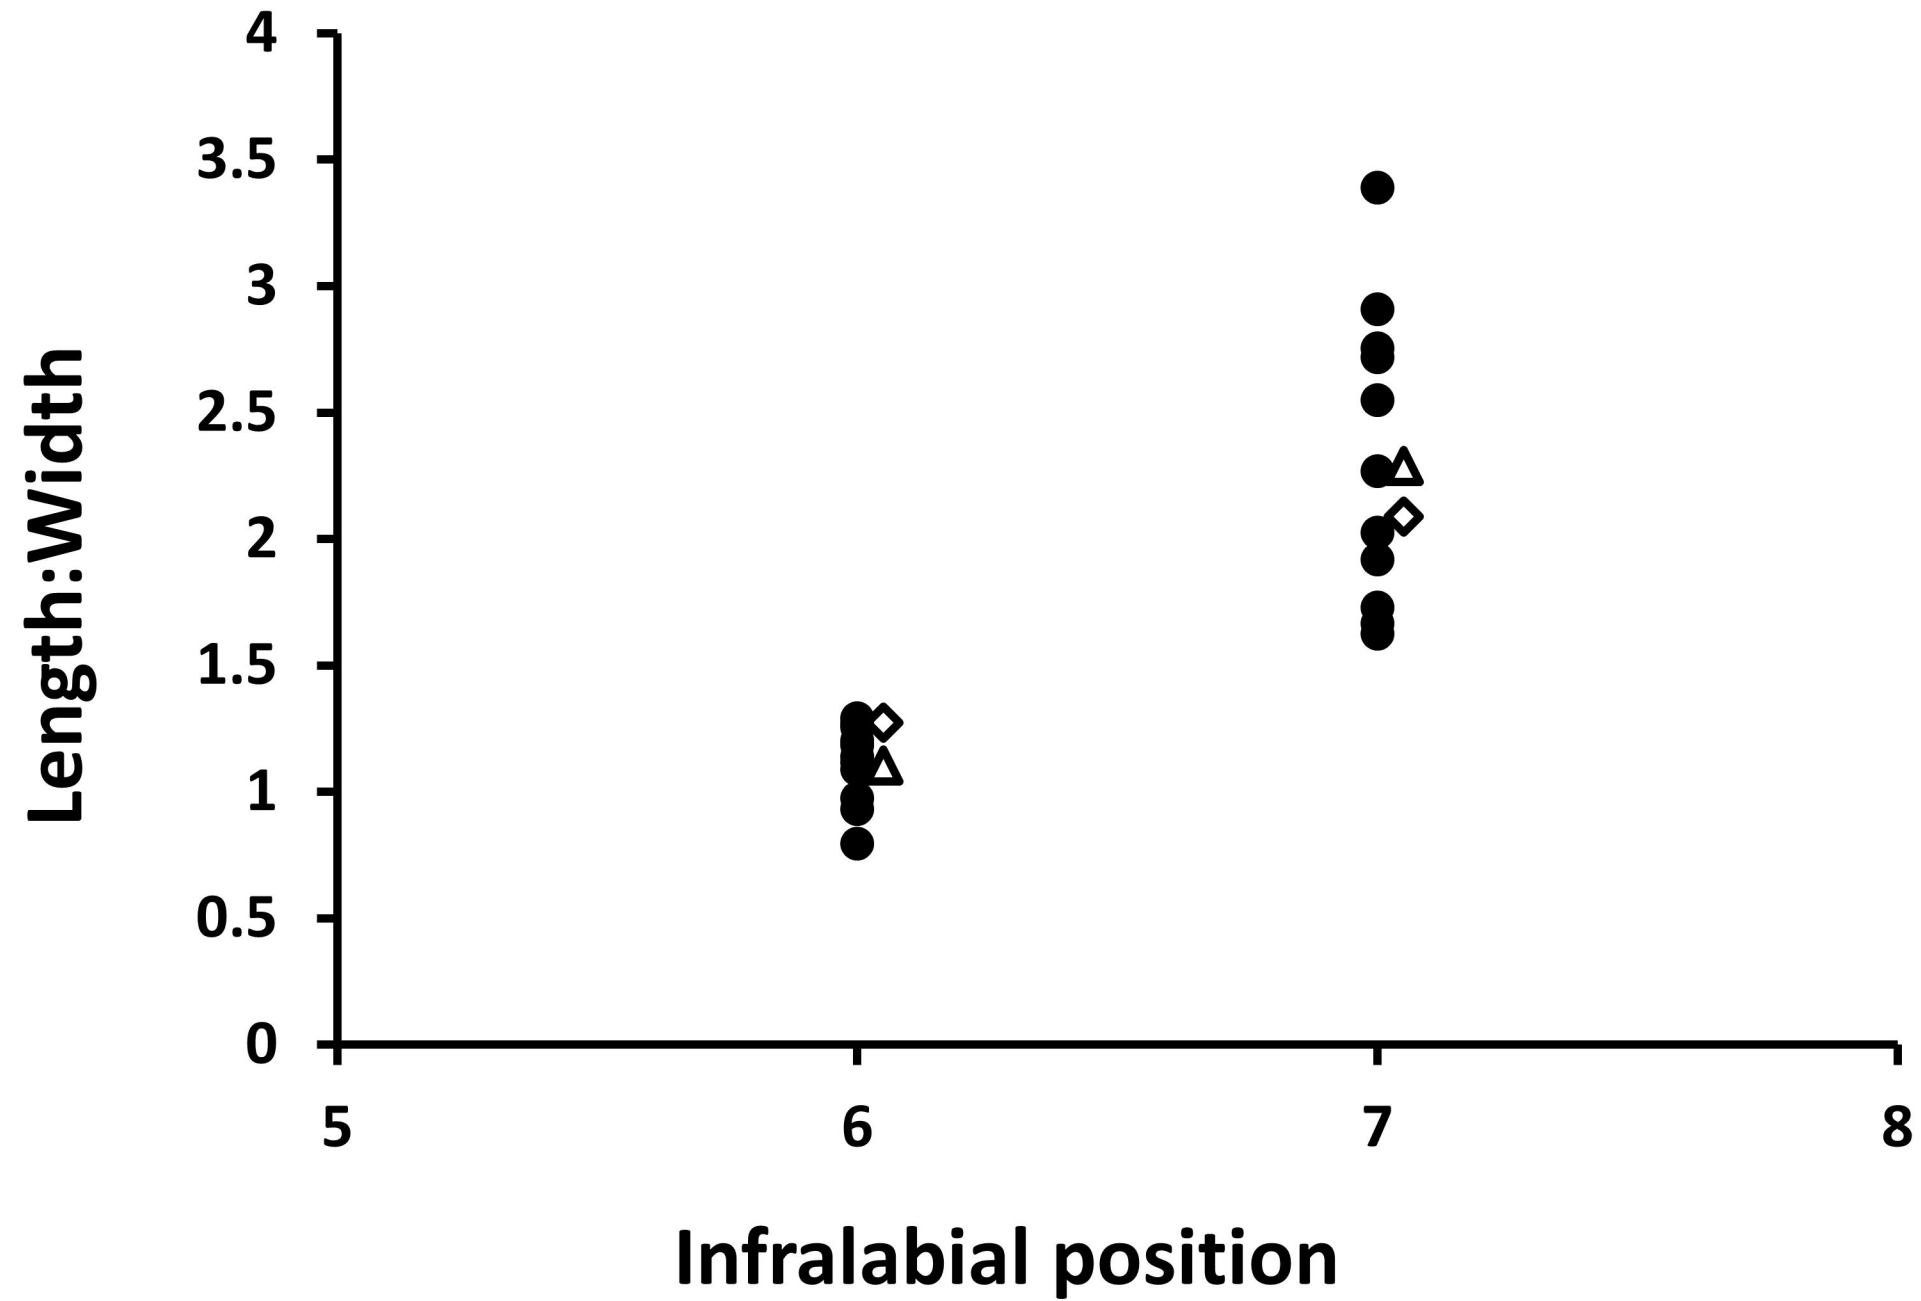

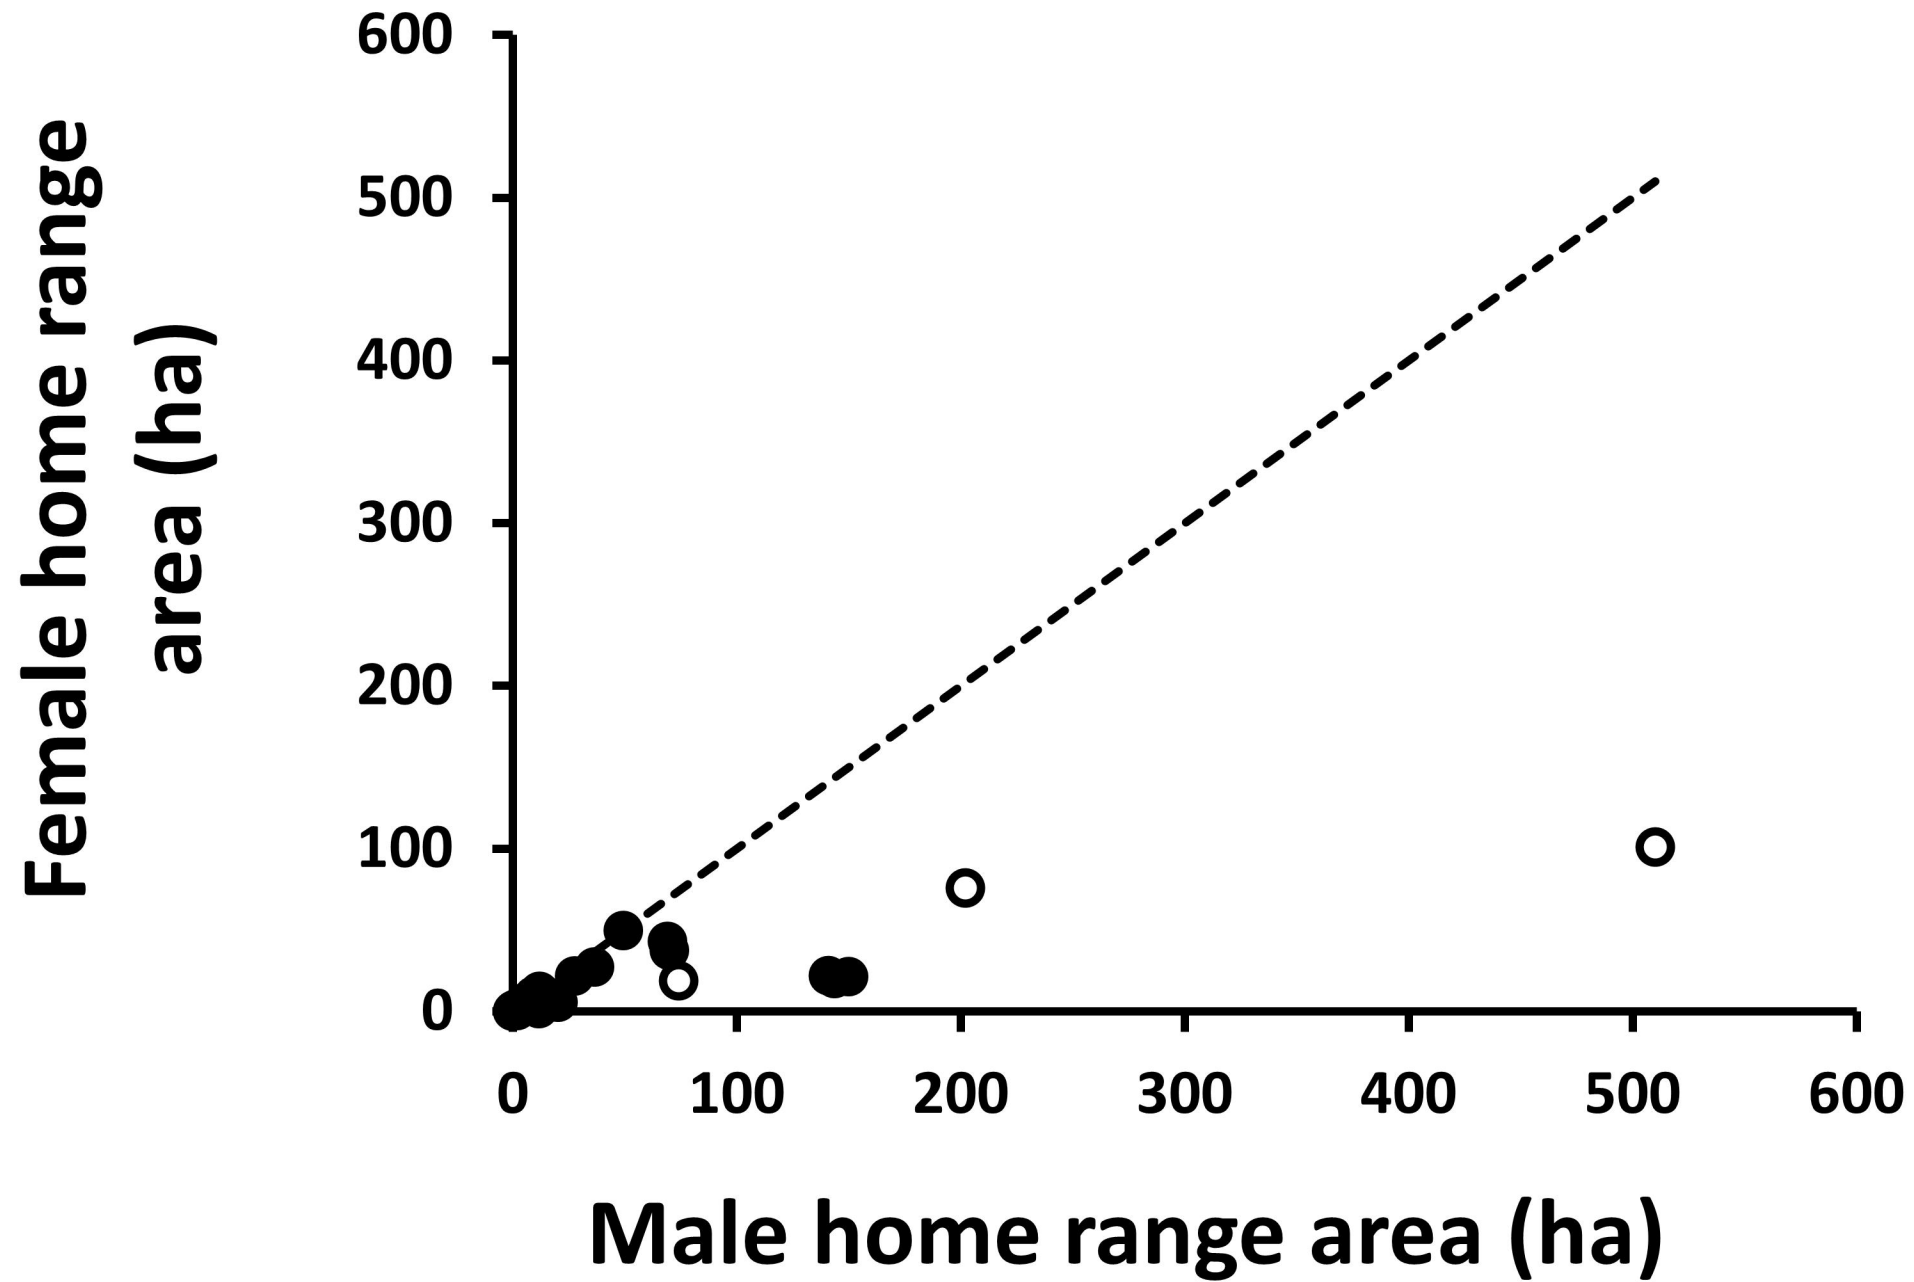

Source: https://www.biorxiv.org/content/biorxiv/early/2018/10/26/318766.full.pdf
